1        **Directed evolution reveals the mechanism of HitRS signal transduction**

2                                **in *Bacillus anthracis***

3

4        Hualiang Pi<sup>1,2</sup>, Michelle L. Chu<sup>3</sup>, Samuel J. Ivan<sup>3</sup>, Casey J. Latario<sup>3</sup>, Allen M. Toth<sup>3</sup>, Sophia M. Carlin<sup>3</sup>,

5                        Gideon H. Hillebrand<sup>3</sup>, Hannah K. Lin<sup>3</sup>, Jared D. Reppart<sup>3</sup>, Devin L. Stauff<sup>3</sup>, and Eric P. Skaar<sup>1,2,#</sup>

6

7        Running title: Genetic selections uncover TCS signaling

8

9

10        <sup>1</sup> Department of Pathology, Microbiology, & Immunology, Vanderbilt University Medical Center,

11        Nashville, Tennessee, USA

12        <sup>2</sup> Vanderbilt Institute for Infection, Immunology, & Inflammation, Vanderbilt University Medical Center,

13        Nashville, Tennessee, USA

14        <sup>3</sup>Department of Biology, Grove City College, Grove City, PA

15        #Address correspondence to [eric.skaar@vumc.org](mailto:eric.skaar@vumc.org)

16

17

18

19

20 **Abstract**

21 Bacterial two component systems (TCSs) have been studied for decades; however, most work has  
22 focused on individual domains or proteins. Systematic characterization of an entire TCS could provide a  
23 mechanistic understanding of these important signal transduction systems. Here, genetic selections were  
24 employed to dissect the molecular basis of signal transduction by the HitRS system that has been  
25 implicated in detecting cell envelope stress in the pathogen *Bacillus anthracis*. Numerous point mutations  
26 were isolated within HitRS, 17 of which were in a 50-residue HAMP domain. Mutational analysis revealed  
27 the importance of hydrophobic interactions within the HAMP domain and highlighted its essentiality in  
28 TCS signaling. In addition, these data defined residues critical for activities intrinsic to HitRS, uncovered  
29 specific interactions among individual domains and between the two signaling proteins, and revealed that  
30 phosphotransfer is the rate-limiting step for signal transduction. This study establishes the use of unbiased  
31 genetic selections to study TCS signaling, provides a comprehensive mechanistic understanding of an  
32 entire TCS, and lays the foundation for development of novel antimicrobial therapeutics against this  
33 important infectious threat.

34

35 Keywords: cell envelope stress/HAMP domain/genetic selection /phosphorylation/TCS signaling

36

37

38

39

40

## 41 **Introduction**

42           The incidence of antibiotic resistant infections is rising globally, leading the world into a “post  
43 antibiotic era” and thus, the need to develop novel therapeutic interventions against bacterial pathogens  
44 is urgent. Emerging evidence suggests that targeting bacterial systems involved in stress response is a  
45 potential avenue for developing antimicrobials (Lee *et al*, 2009; Poole, 2014; Tkachenko, 2018). Therefore,  
46 identification and characterization of stress detection and detoxification mechanisms in pathogenic  
47 bacteria is of critical importance. *Bacillus anthracis* is a Gram-positive, spore-forming, facultative aerobe,  
48 and the causative agent of anthrax. *B. anthracis* spores can survive extreme temperatures, harsh chemical  
49 assaults, and nutrient-poor environments for many years (Goel, 2015). This pathogen is one of the few  
50 infectious agents that have been proven effective as weapons of bioterror and it causes a variety of  
51 infectious syndromes including cutaneous, gastrointestinal, and inhalation anthrax. Inhalation anthrax  
52 occurs when *B. anthracis* spores enter a host through the respiratory system before disseminating to the  
53 lymph nodes and is the most deadly form of anthrax with a mortality rate approaching 90% (Kamal *et al*,  
54 2011). To survive interactions with the host immune system during infection, *B. anthracis* has developed  
55 comprehensive systems for stress detection and detoxification (Shatalin *et al*, 2008). Therefore, this  
56 intracellular pathogen is also an excellent model to study microbial stress responses.

57           Bacterial transcriptional changes in response to stress can be modulated by signal transduction  
58 systems known as two-component systems (TCSs). TCSs detect a wide range of signals and stressors  
59 including pH, temperature, nutrient, light, small molecules, envelope stress, osmotic pressure, and the  
60 redox state (Brunskill & Bayles, 1996; Fournier & Klier, 2004; Giraudo *et al*, 1997; Martin *et al*, 1999; Recsei  
61 *et al*, 1986; Tkachenko, 2018; Yarwood *et al*, 2001). TCSs enable cells to sense, respond, and adapt to  
62 changes in their environment and regulate a wide variety of processes including virulence, sporulation,  
63 antibiotic resistance, nutrient uptake, quorum sensing, and membrane integrity (Hoch, 2017; Mike *et al*,  
64 2014; Stauff & Skaar, 2009; Tierney & Rather, 2019). A prototypical TCS consists of a membrane-bound

65 sensor protein (histidine kinase, HK) and cytoplasmic response regulator (RR) (Bhate *et al*, 2015; Jacob-  
66 Dubuisson *et al*, 2018; Stock *et al*, 2000). A classic HK possesses five domains: a N-terminal Trans-  
67 Membrane domain (TM), a sensor domain, a HAMP domain that is commonly found in Histidine kinase,  
68 Adenylyl cyclases, Methyl-accepting chemotaxis protein, and Phosphatase, a DHP domain (Dimerization  
69 and Histidine phosphorylation), and a CA domain (Catalytic and ATP-binding) (Figure 1A) (Bhate *et al*,  
70 2015; Jacob-Dubuisson *et al*, 2018; Stock *et al*, 2000). The latter two domains constitute the kinase core  
71 domains that harbor a number of well-characterized and conserved motifs (Figure S1). The DHP domain  
72 can be further divided into four subgroups based on sequence identity: HisKA, HisKA\_2, HisKA\_3, and  
73 his\_kinase domains and about 80% of HKs contain a HisKA domain (Zschiedrich *et al*, 2016). The CA domain  
74 belongs to the HATPase\_c domain family and exhibits a relatively slow ATPase activity (Wang *et al*, 2013).  
75 A typical RR consists of two domains: a phosphorylation receiver domain and an output effector domain  
76 (Figure 1A and S2), with more than 60% of the latter being a DNA-binding domain (Bhate *et al*, 2015;  
77 Jacob-Dubuisson *et al*, 2018; Stock *et al*, 2000). In the presence of a specific stimulus, the HK detects the  
78 signal via the sensor domain, transmits the signal onto the DHP domain through the HAMP linker,  
79 phosphorylates its own conserved His located in the DHP domain, and then transfers the phosphoryl  
80 group onto a conserved Asp in the receiver domain of the cognate RR. In the case of the RR being a  
81 transcriptional regulator, this phosphorylation event activates the RR, induces homodimerization of the  
82 receiver domain, stimulates binding to the target promoters, regulates target gene expression, and  
83 modulates cellular physiology in response to environmental stimuli. TCSs are present in nearly all  
84 sequenced bacterial genomes as well as some fungal, archaeal, and plant species but are absent in animals  
85 and humans (Bhate *et al*, 2015; Jacob-Dubuisson *et al*, 2018; Stock *et al*, 2000), making them attractive  
86 targets for antimicrobial therapeutics.

87 *B. anthracis* encodes approximately 45 TCSs, reflecting the complex environmental conditions  
88 encountered by this pathogen. A few *B. anthracis* TCSs have been studied (Laut *et al*, 2020; Mike *et al*,

89 2014; Stauff & Skaar, 2009), including a heme sensor system (HssRS) that responds to changes in available  
90 heme and activates the expression of a heme efflux pump upon heme exposure, and a HssRS interfacing  
91 ICS (HitRS) that senses cell envelope stress and activates an uncharacterized transporter system (HitP)  
92 (Mike *et al.*, 2014; Stauff & Skaar, 2009). Although the nature of the activating signal of HitRS remains  
93 unclear, a high-throughput screen identified a series of cell-envelope acting compounds as inducers of  
94 HitRS (Mike *et al.*, 2014; Mike *et al.*, 2013), including the small synthetic compound VU0120205 ('205)  
95 (Mike *et al.*, 2013), nordihydroguaiaretic acid, which is an antioxidant that possesses activity against the  
96 cell membrane (Ooi *et al.*, 2015), chlorpromazine, which is an antipsychotic drug that inhibits cell wall  
97 biogenesis (Klubes *et al.*, 1971), targocil, which is an antibiotic that inhibits wall teichoic acid synthesis (Lee  
98 *et al.*, 2010), and vancomycin, which inhibits Gram-positive cell wall biosynthesis and disrupts membrane  
99 integrity at low concentrations (Watanakunakorn, 1984). These compounds share little structural  
100 similarity but each is implicated in cell envelope stress suggesting that HitRS senses perturbations in the  
101 cell envelope.

102 In this study, genetic selection strategies were utilized to dissect the molecular mechanisms of  
103 signal transduction by HitRS. Numerous point mutations that lead to either inactivation or constitutive  
104 activation of the HitRS system were isolated. Representative mutations in each domain of these proteins  
105 were characterized biochemically to evaluate the effects of identified mutations on various activities  
106 required for signal transduction. These data uncovered the essential molecular determinants for HitRS  
107 signal sensing and promoter activation including: (i) four residues critical for the autokinase activity  
108 (S136/F149/V274/G309) besides the well conserved phosphoaccepting His and ATP-binding Asn, (ii) three  
109 residues essential for the phosphatase activity (S141/F149/R306), and (iii) five additional residues within  
110 HitR crucial for phosphotransfer and DNA-binding (F95/P106/P155/R192/Y222) besides the conserved  
111 phosphoaccepting Asp. In addition, our results revealed specific interactions among various domains,  
112 particularly the two kinase core domains and the two RR domains, and between HitR and HitS. Importantly,

113 this study provides a detailed systematic characterization of TCS and expands our understanding of the  
114 molecular basis of signal transduction through TCS. Given that these signaling proteins are well conserved  
115 among distinct bacterial species, the described genetic selection and information obtained from it may be  
116 broadly applicable across multiple TCSs.

117

## 118 **Results**

### 119 **Devising genetic selections to study the mechanism of HitRS signaling**

120 To dissect the molecular determinants within HitRS that are required for signal sensing and  
121 promoter activation, two sets of genetic selections were performed. To isolate mutations that lead to  
122 constitutive activation of HitRS, we created a *B. anthracis* strain harboring the erythromycin resistance  
123 gene *ermC* driven by the HitRS promoter ( $P_{hitermC}$ ) (Figure 1B). This strain was plated on medium  
124 containing toxic levels of erythromycin and colonies that arose represented bacteria that acquired  
125 mutations that constitutively activate the  $P_{hit}$  promoter (Figure 1C). Thus we named this selection the  
126 “*ermC* selection” and the constitutive activating mutations “ON” mutations.

127 To identify critical residues within HitRS required for signal transduction, *B. anthracis* strains were  
128 created in which  $P_{hit}$  drives expression of two copies of *Escherichia coli* *relE* ( $P_{hitrelE}$ ) (Figure 1B). The gene  
129 *relE* encodes an mRNA endoribonuclease that, when expressed following  $\sigma^{205}$ -dependent activation of  
130 HitRS, cleaves mRNA leading to cell death. In addition, strains were created that harbor one or two copies  
131 of *hitRS*, the latter to select for strongly inhibitory variants of HitRS or mutations outside of *hitRS*. Colonies  
132 that arose from this selection represent strains containing mutations that render them unable to activate  
133 HitRS-dependent signal sensing and gene activation (Figure 1D). The employment of two copies of *relE*  
134 excluded mutations within *relE* and enabled preferential isolation of mutations within *hitRS* that inactivate

135 signaling of this TCS. Therefore we named this selection the “*relE selection*” and inactivating mutations  
136 “OFF” mutations.

137 Three types of mutations were isolated from both selections: deletions, frame shifts, and point  
138 mutations. Point mutations enabled us to define residues critical for HitRS signal transduction and  
139 therefore were the focus of this study. Numerous point mutations were isolated that led to either  
140 inactivation or constitutive activation of HitRS, including 40 point mutations that were dispersed in  
141 different domains of HitS (2 in the TM domain, 3 in the sensor domain, 17 in the HAMP domain, 9 in the  
142 DHP domain, and 9 in the CA domain) (Figure S3A) and 8 point mutations in HitR (3 in the receiver domain  
143 and 5 in the DNA-binding domain) (Figure S3B). Among these point mutations, 28 were constitutively  
144 activating ON mutations while 20 were inactivating OFF mutations (Figure S3). These point mutations  
145 enabled structure-function analysis to interrogate the roles of individual residues and domains and define  
146 the molecular basis of HitRS signaling.

#### 147 **HitS is an intramembrane-sensing HK that detects cell envelope stress**

148 HK sensor domains are highly variable, reflecting the wide variety of input signals that these  
149 proteins can sense. Signals perceived by the sensor domain are propagated to the cytoplasm through the  
150 TM helices. HitS contains two putative TM helices, the orientation and location of which were consistently  
151 predicted by multiple programs including SMART (Letunic & Bork, 2017) and TOPCONS (Tsirigos *et al.*,  
152 2015). TM1 (residue 11 to 31) spans from cytosol to exterior while TM2 (residue 47 to 65) spans from  
153 exterior to cytosol. These two helices are connected by a 15-amino-acid sensor domain (Figure S3A).  
154 Notably, HKs with small sensor domains ( $\leq 25$  amino acids) have been characterized as intramembrane-  
155 sensing HKs (Mascher, 2006, 2014). This group of HKs detect signals within the membrane interface and  
156 are often involved in cell envelope stress (Mascher, 2006), which coincides with HitRS being activated by  
157 several cell-envelope acting compounds (Mike *et al.*, 2014).

158 Five point mutations from the genetic selections were mapped to this region: two (S25Y and A27E)  
159 in TM1 and three (D36V, L42F, and V46G) in the sensor domain. All of these mutations are ON mutations  
160 (Figure S3A), indicating that each mutation triggers a sufficient conformational change to enable HitS  
161 activation that normally only takes place upon stress detection or ligand binding. Several studies have  
162 shown that hydrophilic residues in the TM segment are important for signal recognition (Gushchin *et al.*,  
163 2017; Krishnakumar & London, 2007; Zschiedrich *et al.*, 2016). Indeed, S25 was substituted by a slightly  
164 polar Tyr while the hydrophobic A27 was substituted by a negatively charged Glu, suggesting that it may  
165 be a common feature that hydrophilic residues of the TM helices participate in stress detection and signal  
166 transduction. There was no clear trend among the three mutations within the sensor domain but all led  
167 to constitutive activity of HitS in the absence of any inducers: the polar D36 was mutated to a bulky  
168 hydrophobic Val, the bulky hydrophobic L42 was substituted by a relatively less hydrophobic Phe with a  
169 larger sidechain, and V46 was mutated to a neutral, small, and flexible Gly (Figure S3A). Very limited  
170 structural information is available to dissect the mechanism of ligand recognition and signal detection;  
171 however, this short sensor domain likely forms a small extracellular loop and binds ligand directly  
172 (Mascher, 2006, 2014). Loop structures can accommodate diverse substitutions, which explains, at least  
173 in part, why the drastic changes from these substitutions are tolerated. Nevertheless, these data suggest  
174 that these residues identified from the genetic selections are important for ligand binding or stress sensing  
175 although the underlying mechanism remains to be elucidated.

#### 176 **Essentiality of HAMP domain for HitS signaling**

177 The input signal perceived by the sensor domain is subsequently transmitted to the intracellular  
178 signaling domains through transducing linkers such as the HAMP domain, which is found in approximately  
179 30% of HKs (Zschiedrich *et al.*, 2016). HitS contains a predicted HAMP domain immediately after TM2. To  
180 predict the tertiary structure of this domain, homology modeling of this segment (residue 66 to 121) was  
181 performed using I-TASSER with default settings (Yang & Zhang, 2015). The closest structural analog was



182 the HAMP domain of *Archaeoglobus fulgidus* Af1503 (PDB ID: 4GN0). The HAMP domain consists of two  
183 parallel helices (HAMP1 and HAMP2), which are connected by a flexible loop, and form a homodimeric  
184 four-helical parallel bundle (Figure 2).

185 To understand the sequence properties and conservation pattern of this domain, a multiple  
186 sequence alignment was performed. HAMP domains are about 50 amino acids long and possess a small  
187 number of conserved residues including the Glu residue that marks the beginning of the HAMP2 helix  
188 (Figure 2A). Interestingly, HitS contains two sterically restricted Pro residues in HAMP1. The first Pro (P72)  
189 is well conserved and its substitution to Leu converted HitS into a constitutively activating ON kinase while  
190 the second Pro (P84) is not conserved and its substitution yielded either a kinase-ON (P84T) or kinase-OFF  
191 (P84L) state (Figure 2). This signifies the importance of these Pro residues in signal transduction. All HAMP  
192 sequences adopt a heptad repeat pattern, in which positions *a* and *d* are occupied predominantly by  
193 hydrophobic residues (Figure 2A). These hydrophobic residues are critical for inter- and intramolecular  
194 interactions within the four-helix bundle (Hulko *et al.*, 2006). Indeed, four hydrophobic residues in this  
195 region (I85, I88, M117, and L121) were identified from genetic selections (Figure 2). I85 is equivalent to  
196 a residue that plays a critical role in signal transduction and that a substitution with a larger sidechain at  
197 this position promotes signaling while a smaller sidechain substitution compromises autokinase activity  
198 in other HKs (Hulko *et al.*, 2006). In fact, substitution of I85 to valine with a slightly smaller sidechain  
199 completely suppressed the HitS response to stress and inactivated the HitRS system (Figure 2),  
200 demonstrating that even small changes at this position can drastically alter autokinase activity. Both M117  
201 and L121 are located in the HAMP2 helix, and it seems likely that substitution of M117 to a bulky Val or  
202 L121 to a sterically restricted Pro may disrupt the  $\alpha$ -helix conformation resulting in protein instability and  
203 loss of autokinase function. Therefore, we conclude that these hydrophobic residues are important for  
204 maintaining hydrophobic interactions within the four-helix bundle and are essential for HAMP function.

205           The flexible connector between the two HAMP helices plays an important role in stabilizing  
206 alternating conformations (Airola *et al*, 2010; Ames *et al*, 2008b). It has been shown that a conserved  
207 glycine and two hydrophobic residues were the only residues critical for signaling function of a serine  
208 chemoreceptor (Ames *et al*, 2008a). Indeed, substitution of the Gly residue (G91) to either positively  
209 charged Arg or negatively charged Glu led to complete loss of autokinase function (Figure 2). In addition,  
210 substitution of the neutral residue S94 to the hydrophobic bulky Leu or mutation of the acidic E100 to  
211 positively charged Lys effectively inactivated the HitRS system (Figure 2), signifying the importance of this  
212 connector in TCS signaling through the HAMP domain.

213           It has been suggested that HAMP domains exist in two conformational states and the transition  
214 between the two alternating states is critical for signal transduction (Bhate *et al.*, 2015). Therefore,  
215 mutations affecting interactions across the close interface within this dynamic four-helix bundle would  
216 result in a constitutive ON or OFF conformation, depending on the location of the residues (Swain & Falke,  
217 2007; Swain *et al*, 2009). Consistent with this, we identified seven point mutations located in the  
218 dimerization interface: R74P, I85V, I88N, A89V or A89E, M117V, and L121P (Figure 2D), all of which  
219 resulted in a kinase-OFF state for HitS (Figure 2B). Collectively, the genetic selections identified 14 critical  
220 residues with 17 point mutations within the HAMP domain. The majority of these mutations are OFF  
221 mutations (14 out of 17; Figure 2B), highlighting the essentiality of the HAMP domain to HitRS signal  
222 transduction.

### 223 **All selected point mutants of HitRS have potent growth phenotypes.**

224           To obtain a soluble form of HitS membrane protein, the N-terminal 67 amino acids were truncated  
225 and the intracellular region of this protein was cloned recombinantly (residue 68 to 352). Homology  
226 modeling of the truncated protein was performed using Phyre2 with default settings (Kelley *et al*, 2015).  
227 Most crystallization studies of proteins with HAMP domains were performed without this domain, and

228 thus analogous structures only contain part or none of the HAMP domain. The homology model with the  
229 highest confidence covers the intracellular domain of HitS from residue 113 to 352. Genetic selections  
230 identified 22 point mutations in this region (Figure S3A), 11 of which were selected based on their  
231 locations on the structural model for further biochemical characterization: 2 in the HAMP domain, 3 in  
232 the DHP domain, and 6 in the CA domain. All 8 point mutations identified within HitR from the genetic  
233 selections were spread out in the two domains of HitR (Figure S3B) and subjected to further biochemical  
234 characterization to evaluate the effects of these mutation on activities required for signal transduction.  
235 Therefore, a total of 21 point mutants including the known phosphorylation-defective variants HitS<sup>H137A</sup>  
236 and HitR<sup>D56N</sup> (Mike *et al.*, 2014) were selected for further study.

237 First the growth phenotype of these selected suppressor mutants was confirmed. As expected, the  
238 parental strain (WT  $P_{hit}ermC$ ) for *ermC* selection showed no growth in the presence of 20  $\mu\text{g ml}^{-1}$  of  
239 erythromycin and reached a similar level of growth after a 15 h lag phase upon '205-mediated activation  
240 (Figure S4), suggesting that accumulation of *ermC* expression is required for cells to gain resistance against  
241 this toxic level of erythromycin. All of the isolated ON mutants showed potent resistance against  
242 erythromycin without significant growth delay. Addition of '205 provided no evident growth advantage  
243 to these mutants under these conditions (Figure S4), suggesting that the erythromycin resistance gene is  
244 highly expressed in these constitutively activating ON mutants and inducers are no longer required to turn  
245 on the HitRS signaling system.

246 For the parental strains used in the *relE* selection ( $P_{hit}relE$ ), '205 was added to the medium to  
247 activate HitRS, leading to expression of *relE* and disruption of cell growth. Indeed, the *relE* strains grew  
248 very poorly with extended lag phases in the presence of '205: ~11 h lag phase for  $2x(relE)$  or ~20 h for  
249  $2x(relE + hitRS)$  parent strain (Figure S5). By contrast, '205 showed no inhibitory effects on any of the OFF  
250 mutants isolated and all OFF mutants grew remarkably well regardless of the presence or absence of '205

251 (Figure S5). These results suggest that these OFF mutants were no longer responding to '205-mediated  
252 activation and their signaling activities were completely abolished.

253 To confirm the effects of these point mutations on transcription of the *hitPRS* operon, quantitative  
254 RT-PCR (qRT-PCR) was carried out to quantify the expression of this operon in these suppressor mutants.  
255 As expected, expression of *hitPRS* was upregulated in all ON mutants even in the absence of the inducer  
256 '205, with the HitS<sup>S141L</sup> mutation giving rise to the strongest activation for each gene (Figure S6A). Addition  
257 of '205 activates expression of the *hitPRS* operon in the WT parental strain (WT *P<sub>hitermC</sub>*) but has negligible  
258 effects for all ON mutants, which explains why '205 provided little growth advantage to these mutants in  
259 the presence of erythromycin (Figure S4 and S6B). For some of the OFF mutants, the basal levels of *hitP*  
260 were notably lower compared to those in WT parental strains, particularly HitR<sup>Y222D</sup> and HitR<sup>P155L</sup> (Figure  
261 S6C). Addition of '205 induces expression of *hitPRS* in both WT parental *relE* strains, consistent with the  
262 poor growth phenotype with extended lag phases observed for these strains (Figure S5 and S6D). As  
263 expected, some OFF mutants showed no apparent response to the '205 inducer such as HitR<sup>P106S</sup>, HitR<sup>R192C</sup>,  
264 HitR<sup>Y222D</sup>, and HitS<sup>M117V</sup>. However, some OFF mutants exhibited a moderate response, particularly the  
265 mutants isolated from the *ermC* strain carrying two copies of HitRS (*2x(relE + hitRS)*) including HitR<sup>F69S</sup>,  
266 HitR<sup>P155L</sup>, and HitS<sup>N248S</sup> (Figure S6D). All of these latter mutants were isolated from the ectopic copy of  
267 *hitRS*, indicating that these OFF mutations are dominant even though the chromosomal copy of *hitRS* was  
268 still intact and responsive to inducers in these mutants.

269 To further confirm the results of the genetic selections, five representative point mutations were  
270 reconstructed in *B. anthracis* WT background and the effects of these chromosomal mutations on  
271 transcription of the *hitPRS* operon were evaluated using qRT-PCR. Expression of *hitPRS* was constitutively  
272 activated in all three ON mutants (HitR<sup>M58I</sup>, HitS<sup>T118I</sup>, and HitS<sup>S141L</sup>) in the absence of the inducer while  
273 activation of *hitPRS* was completely abolished in both OFF mutants (HitR<sup>R192C</sup> and HitS<sup>N248S</sup>) even in the

274 presence of '205 (Figure S6E-F). These results demonstrate that the genetic selections are robust and  
275 powerful tools to dissect the molecular determinants that are crucial for HitRS signal transduction.

### 276 **Critical residues within HitRS stabilize the proteins and facilitate dimerization**

277 Mutations selected in each domain of HitS and HitR were recreated using site-directed mutagenesis  
278 and mutant and WT proteins were purified. During the process of protein purification, we noticed some  
279 mutant proteins were unstable. Protein misfolding can lead to proteolytic degradation and subsequent  
280 protein inactivation. Indeed, four inactive OFF mutants were unstable: M117V and N248S in HitS, and  
281 P106S and Y222D in HitR, all of which showed apparent degradation products upon SDS-PAGE. In  
282 particular, M117V and Y222D (Figure 3A-B), exhibited susceptibility to proteolysis, indicating that these  
283 mutations led to defects in protein folding. Surprisingly, V274A, one of the HitS ON mutants, is partially  
284 unstable (Figure 3A). V274 marks the beginning of the D-box and is located in one of the antiparallel  $\beta$ -  
285 sheets that hang over the ATP-binding pocket (Figure 3E and S1C). The C-beta branched Val residue is  
286 bulky and suitable for  $\beta$ -strand conformation compared to Ala with a small sidechain. Thus this  
287 substitution might disrupt the  $\beta$ -strand conformation resulting in defects in protein folding. It is intriguing  
288 how this V274A ON mutation promotes phosphorylation at the expense of protein stability.

289 Most HKs and RRs have been demonstrated to function as homodimers (Bhate *et al.*, 2015;  
290 Zschiedrich *et al.*, 2016). The dimer interface is located in the DHp domain of the HK while the receiver  
291 domain is dimerized upon RR activation triggered by phosphorylation. To determine the effects of the point  
292 mutations on dimerization status, WT and mutant proteins were subjected to non-denaturing native gel  
293 electrophoresis to analyze their mobility patterns in the folded state. No significant differences were  
294 observed for all HitS mutants compared to WT except that proteolytic degradation of unstable mutants  
295 was apparent in the native gel (Figure 3C), which was consistent with the prior results (Figure 3A). All the  
296 HitR mutants from the receiver domain formed a relatively sharp band similar to the mutant D56N, which

297 is known to be an inactivating mutant due to loss of phosphotransfer capability (Mike *et al.*, 2014).  
298 Surprisingly, all four point mutants in the DNA-binding domain of HitR (K168A, R192C, E203A, and Y222D)  
299 migrated differently through the gel compared to WT (Figure 3D). Multiple variables could contribute to  
300 differences in migration including charge-to-mass ratio, folding status, and physical shape of the protein,  
301 which makes it challenging to interpret the different patterns observed. To further examine the  
302 dimerization status of these mutants, HitR WT and all of the mutants except the unstable Y222D mutant  
303 were subjected to size exclusion chromatography, which separates proteins on the basis of molecular  
304 weight. These data showed that the composition of WT HitR was about 45% dimer and 55% monomer in  
305 solution (Figure 3F). As expected, the ON mutation K168A promoted dimerization and drove the  
306 equilibrium towards the dimeric form with an increase of 25% (Figure 3F), indicating mutation of this polar  
307 residue (K168) to a slightly hydrophobic Ala apparently facilitates hydrophobic interactions between  
308 monomers. However, it was surprising to note that the OFF mutant R192C promoted dimerization while  
309 the ON mutant E203A disrupted dimerization *in vitro* (Figure 3F). This seemed counterintuitive, however  
310 some RRs have been shown to form two types of dimers in distinct orientations and only the dimer in the  
311 correct orientation is active (Mack *et al.*, 2009), which could explain this contradictory observation. In  
312 addition, all three substitutions followed the same trend of replacing hydrophilic residues (K168, R192,  
313 and E203) with hydrophobic residues (Ala or Cys), indicating that introducing hydrophobic residues at  
314 these positions (Figure 3G), particularly K168 and R192, enhances hydrophobic interactions and facilitates  
315 dimerization. An important caveat is that RR dimerizes upon phosphorylation and the results may not  
316 reflect the dimerization status of these mutants during signal transduction *in vivo*. Thus a thorough  
317 evaluation is required to dissect the effects of these mutations on other protein activities such as  
318 phosphotransfer and DNA-binding. Nonetheless, these data suggest that residues in the DNA-binding  
319 domain interact with the dimer interface of the receiver domain and may affect TCS signaling through  
320 modulating HitR dimerization status.

## 321 **The autokinase activity of HitS can be modulated in four different manners**

322 To understand how one single-residue mutation alters protein function and locks a protein in a  
323 constitutively on or off state, we tested the effects of mutations on different activities intrinsic to the  
324 protein including autokinase activity. Consistent with a prior study (Mike *et al.*, 2014), substitution of the  
325 well-conserved phosphoaccepting histidine residue (H137) to alanine abolishes autokinase activity (Figure  
326 4A-B). Likewise, the two OFF mutations (M117V and N248S) led to a complete loss of autokinase activity  
327 (Figure 4A-B). The M117V mutation inactivates autokinase activity potentially by disrupting the  $\alpha$ -helix  
328 conformation of the HAMP domain while N248S does so likely by disrupting the hydrogen bonds between  
329 Asn and ATP adenine resulting in abolished ATP-binding. In addition, two of the ON mutations (D227V and  
330 R306S) promoted autokinase activity and several ON mutants showed similar autokinase activity  
331 compared to WT (Figure 4A-B). However, we were surprised to note that four ON mutants exhibited  
332 significantly reduced autokinase activity:  $\sim$ 10-fold reduction for S136F,  $\sim$ 3-fold reduction for F149L,  $\sim$ 2-  
333 fold reduction for V274A, and  $\sim$ 4-fold reduction for G309R relative to WT. To better understand how these  
334 ON mutations affect autokinase activity, autophosphorylation kinetics of HitS WT and ON mutants were  
335 monitored for 15 min. Three distinct groupings were revealed: (i) some mutations facilitated the  
336 autokinase activity with a higher kinetic rate (A300E, D227V and R306S), (ii) some mutations showed minor  
337 effects (S141L and T118I), and (iii) some mutations disrupted the autokinase activity with a lower  
338 autophosphorylation rate resulting in significantly diminished autokinase yield (S136F, F149L, V274A, and  
339 G309R) (Figure 4C-F and table S3). Thus, we conclude HitS autophosphorylation can be modulated in four  
340 different manners including abolished activity observed in OFF mutants (Figure 4). Furthermore, these  
341 data uncovered four additional residues critical for the autokinase activity: S136/F149 adjacent to the  
342 phosphorylation site and V274/G309 from the CA domain, in addition to the well conserved  
343 phosphoaccepting His and ATP-binding Asn. However, the observation that ON mutants exhibited

344 reduced autokinase activity appeared contradictory, suggesting that the phosphotransfer rates of these  
345 proteins might be altered to compensate for this reduction.

### 346 **Phosphotransfer is the rate-limiting step for signal transduction.**

347 Next we examined the impact of all HitS ON mutations on phosphotransfer efficiency. HitS WT or  
348 each ON mutant was autophosphorylated with [ $\gamma$ -<sup>32</sup>P]-ATP and phosphotransfer from HitS WT or mutant  
349 to HitR WT was then monitored for 15 min. Indeed, all ON mutants transferred the phosphorylation signal  
350 significantly faster than WT, including the mutants with defects in autokinase activity such as S136F,  
351 V274A, and G309R (Figure 5). This indicates that these mutations are functional trade-offs where the  
352 autokinase activity is compensated, at least in part, by faster phosphotransfer. In addition, it is important  
353 to note that the phosphotransfer took place in an instantaneous manner. More than 60% of the phosphor  
354 signal was transferred from HitS to HitR within 15 seconds (Figure 5A and 5C). Thus we conclude that  
355 phosphotransfer from HitS to its cognate regulator HitR is the rate-limiting step for signal transduction.

### 356 **Critical residues required for the phosphatase activity of HitS.**

357 Many HKs are bifunctional enzymes that function as both kinases and phosphatases (Batchelor &  
358 Goulian, 2003). The autokinase-competent and phosphatase-competent states need to be maintained in  
359 balance and modulated in response to specific environmental cues. Importantly, dephosphorylation is not  
360 a simple reverse reaction of phosphorylation and may require different residues to achieve this activity.  
361 To define the crucial residues required for HitS phosphatase activity, we examined the effects of HitS  
362 mutations on dephosphorylation of its cognate regulator HitR. Briefly, the GST-PmrBc fusion protein (Kato  
363 & Groisman, 2004) was autophosphorylated and served as a phosphor donor, and the phosphoryl group  
364 was subsequently transferred to HitR WT protein. Dephosphorylation of the resultant phosphorylated  
365 HitR WT protein was then monitored for 60 min. First, we evaluated the three OFF mutants. H137A  
366 abolished the autokinase activity completely (Figure 4A-B); however, the phosphatase activity was intact



367 and comparable to that of WT (Figure 6A and 6C), suggesting that the phosphoaccepting residue is  
368 dispensable for the phosphatase activity and HitS is therefore not a reverse phosphatase. The two other  
369 OFF mutants (M117V and N248S) showed significantly compromised phosphatase activity (Figure 6A and  
370 6C) with abolished autokinase activity (Figure 4A-B), likely due to instability of these two mutant proteins  
371 (Figure 3A). RR dephosphorylation can be catalyzed by either HK-mediated dephosphorylation or auto  
372 hydrolysis. The latter is probably why minimal dephosphorylation activity was still observed. Next, we  
373 tested the four ON mutants located in the DHp domain, two of which showed drastically diminished  
374 activity in dephosphorylation including S141L and F149L (Figure 6A and 6D). We then examined the five  
375 ON mutants located in the CA domain, only one (R306S) of which exhibited reduced activity in  
376 dephosphorylation (Figure 6A and 6E). When the phosphatase activity of HK is disrupted, this eliminates  
377 its ability to remove the phosphoryl group from its cognate RR and the phosphorylated RR can stay active  
378 longer thereby promoting signal transduction and gene activation. We conclude these three residues  
379 (S141, F149, and R306) are critical for phosphatase activity. Furthermore, these data demonstrated that  
380 both HAMP and DHp domains are important for dephosphorylation and not all residues critical for  
381 autokinase activity are important for dephosphorylation.

## 382 **Residues essential for HitR activation and specific interactions within HitR**

383 RRs function as phosphorylation-triggered switches that mediate cellular physiology in response to  
384 environmental cues largely through two steps: phosphotransfer from HK to RR and RR-DNA-binding. To  
385 examine the effects of HitR mutations on signal reception, the phosphotransfer efficiency was evaluated  
386 in HitR WT and HitR mutants. HitS WT was autophosphorylated with ATP [ $\gamma$ - $^{32}$ P] and the phosphoryl group  
387 was subsequently transferred to HitR WT or mutant proteins. Consistent with a prior study (Mike *et al.*,  
388 2014), substitution of the conserved phosphoaccepting residue Asp (D56) to Asn abolishes phosphor  
389 signal reception (Figure 7A-B). Two of the three ON mutations (M58I and K168A) showed significantly  
390 enhanced activity in phosphotransfer (Figure 7A-B). Among five isolated OFF mutations, only P106S

391 showed ~50% reduction of activity in phosphotransfer compared to WT (Figure 7A-B), which could be  
392 explained by protein instability (Figure 3B). However, it was intriguing that Y222D mutation located in the  
393 DNA-binding domain exhibited an equivalent level of phosphotransfer activity compared to WT in spite of  
394 being the most unstable HitR mutant (Figure 7A-B and 3B).

395 To better understand how these mutations affect phosphor signal reception, the kinetics of  
396 phosphotransfer from HitS WT to HitR WT or mutants was monitored for 30 min. None of the ON mutants  
397 exhibited an accelerated rate of phosphotransfer while all OFF mutants displayed significantly slower  
398 kinetic rates relative to WT HitR (Figure 7C-D). M58 is located in the loop between  $\beta 3$  and  $\alpha 3$  of the  
399 receiver domain (Figure 7G), and loop structures can tolerate a large number of diverse substitutions,  
400 which is probably why substitution of M58 to a bulky Ile showed no evident effects on protein stability  
401 (Figure 3B). In addition, M58 is in very close proximity to the phosphoaccepting residue D56 (Figure 7G)  
402 and the substitution to Ile appeared to facilitate phosphotransfer, indicating that M58 is involved in  
403 phosphorylation signal reception. K168 marks the C-terminal end of  $\alpha 6$  in the DNA-binding domain and  
404 its substitution to Ala had no notable effects on protein stability (Figure 3B) but promoted  
405 phosphotransfer (Figure 7A-B), suggesting that the DNA-binding domain interacts with the receiver  
406 domain and facilitates phosphorylation reception. These data also indicate that  $\alpha 6$  helix may be part of  
407 the interface of these two domains and important for their interaction between these two domains. P155  
408 marks the end of the loop between  $\beta 8$  and  $\alpha 6$  in the DNA-binding domain (Figure 7G), and its substitution  
409 to Ser was permitted in the loop structure, resulting in a mutant protein with comparable stability to WT  
410 (Figure 3B). However, the tight turn created by Pro was likely destroyed by Ser substitution resulting in  
411 defects in phosphotransfer (Figure 7A-D). This indicates that this flexible loop not only enables  
412 conformational changes transmitted from the receiver domain to the effector DNA-binding domain, but  
413 also facilitates phosphotransfer from HK to RR. Both R192 and Y222 are located in the DNA-binding  
414 domain. R192 resides in helix  $\alpha 8$  and Y222 is in the last  $\beta$ -strand. Interestingly, mutation of either residue

415 affected reception of the phosphoryl group, exemplifying the importance of the DNA-binding domain  
416 during phosphotransfer and interaction between the two domains of HitR.

417 Next, we investigated the effects of HitR mutations on HitR-DNA-binding ability using an  
418 electrophoretic mobility shift assay (EMSA). HitR WT or mutant protein was first activated by  
419 autophosphorylation, and the binding affinity to the target promoter was then evaluated. HitR WT binds  
420 DNA with an affinity of ~55 nM, and as expected, the D56N mutation led to a complete loss in DNA-binding.  
421 Remarkably, no visible band-shift was observed for all five OFF mutations with up to 100 nM of protein  
422 tested except P106S, which showed a smear with the highest protein concentrations (70-100 nM),  
423 indicative of a protein-DNA complex (Figure 7E). Most of the OFF mutants showed a relatively slower rate  
424 in phosphorylation reception without much difference in the final outcome compared to WT, with the  
425 only exception of P106S that showed a 50% reduction in phosphotransfer within 30 min (Figure 7A-D).  
426 However, the effects of these mutations on protein-DNA-binding were strikingly disruptive (Figure 7E),  
427 further confirming that even a small difference in the kinetic rate can lead to severe defects in protein  
428 function, consistent with phosphotransfer being the rate limiting step for signal transduction. As  
429 anticipated, all ON mutants exhibited much higher affinity to the target promoter. M58I mutation  
430 facilitates phosphotransfer from HitS to HitR, which in turn promotes DNA-binding with a 5-fold increase  
431 in binding affinity. Both ON mutations (K168A and E203A) from the DNA-binding domain had no significant  
432 effects on phosphotransfer kinetics. However, these two mutations dramatically enhanced protein-DNA-  
433 binding with 10-fold higher affinity compared to that of WT (Figure 7E-G). We hypothesized that these  
434 two ON mutants might bypass phosphorylation and bind DNA with greater affinity without  
435 phosphorylation-mediated activation.

436 To test the essentiality of HitR activation through phosphorylation for HitR-DNA-binding, we  
437 repeated EMSA experiments using WT HitR and the three ON mutants in the absence of phosphorylation.  
438 HitR WT or mutant were incubated directly with radioactively labelled DNA probe and the binding affinity

439 was examined. Surprisingly, HitR WT binds to DNA with comparable affinity regardless of phosphorylation  
440 activation (Figure S7), likely due to overexpression of HitR in *E. coli* that led to a conformational transition  
441 from an inactive to active-like state as observed for KdpE previously (Narayanan *et al*, 2014). However, in  
442 the absence of phosphorylation, the DNA-binding activity of the M58I mutant was completely abolished  
443 with up to 800 nM of the mutant protein tested. K168A showed similar DNA-binding activity as WT while  
444 E203A only preserved minimal activity (Figure S7), which could be explained by the influence of these  
445 mutations on HitR dimerization status: K168A facilitated dimerization while E203A disrupted dimerization  
446 *in vitro* (Figure 3F), signifying the importance of dimerization in HitR activation. Furthermore, it is clear  
447 that phosphorylation-triggered activation is crucial for HitR-DNA-binding. Taken together, we conclude that  
448 the receiver and DNA-binding domains communicate through critical residues as they work together to  
449 ensure HitR phosphorylation and downstream gene activation in response to specific stimuli.

#### 450 **Residues critical for HitS-HitR interaction.**

451 It is noteworthy that the HitS ON mutation of F149 to Leu in the RR-binding interface led to potent  
452 activation of HitRS signaling (Figures S1A, S4E, S6A and Table S3). This is a typical functional trade-off  
453 mutation that affects all three activities with diminished autophosphorylation, enhanced phosphotransfer,  
454 and disrupted dephosphorylation (Table S3), underscoring the significance of the RR binding interface in  
455 all three catalytic reactions of HitS. We reasoned that this mutant, along with some other mutants from  
456 Helix 1, would affect HitS-HitR interaction. To test this idea, we determined HitS-HitR binding affinity *in*  
457 *vitro* using microscale thermophoresis. The two WT proteins bound to each other with an affinity of  
458 385nM (Figure S8A), and activated HitS modestly enhanced the binding affinity with a  $K_d$  value of 270 nM  
459 (Figure S8B). The difference was not dramatic but could be physiologically relevant during HitRS signaling  
460 *in vivo* since some RRs even exhibit a reduced affinity for their cognate kinases upon phosphorylation (Li  
461 *et al*, 1995). Surprisingly, both HitR<sup>S141L</sup> and HitR<sup>F149L</sup> drastically disrupted the protein-protein interaction.  
462 Specifically, when the mutants were not activated, the binding affinity was 4-6 times lower compared to

463 WT (Figure S8C and S8E). When HK is not activated through autophosphorylation, it is in phosphatase-  
464 competent state. These data explained why the phosphatase activity of these two mutants (HitR<sup>S141L</sup> and  
465 HitR<sup>F149L</sup>) was disrupted (Figure 6A and 6D). By contrast, activation of these two mutants mediated by  
466 autophosphorylation improved their binding affinity to HitR, although still significantly weaker than WT  
467 (Figure S8D and S8F). These data indicate that these two residues (S141 and F149) of HitS are important  
468 for HK-RR interaction particularly during dephosphorylation.

469

## 470 **Discussion**

471 Recent structural and biochemical work has provided valuable signaling models and substantially  
472 deepened our understanding on the molecular basis of signal transduction from external input domains  
473 to cytoplasmic output domain. Heretofore, there are more than 600 three-dimensional structures of HKs  
474 and RRs available; however, most of these structures are for individual domains, particularly for the  
475 membrane-bound HKs. It is challenging to obtain high-resolution structures of full-length proteins due to  
476 solubility, flexibility, and dynamics of the sensor HKs. Individual domains have inherent features and  
477 functional modes, but their interactions with other partners are crucial for specific signaling pathways and  
478 regulatory mechanisms. In this study, robust and unbiased genetic selections enabled selection of point  
479 mutations within HitRS that constitutively switch on or off signal transduction of this TCS and these point  
480 mutations were further characterized systematically. Our data demonstrated the effects of these  
481 mutations on diverse activities intrinsic to TCS signaling, defined the critical residues that are involved in  
482 HitRS signal transduction, determined phosphotransfer as the rate-limiting step for signal transduction,  
483 and shed light on the signaling mechanism of each individual domain and the TCS as a whole.

## 484 **Hydrophobic interactions within HAMP domain**

485 HAMP domains in HKs are typically located immediately after the C-terminal transmembrane helix  
486 and function as signal transducing modules that couple conformational changes of sensory domains to  
487 the catalytic activity of the kinase core domains (Bhate *et al.*, 2015; Zschiedrich *et al.*, 2016). HAMP  
488 domains can be swapped among proteins without compromised functionality (Appleman *et al.*, 2003; Zhu  
489 & Inouye, 2003), indicative of a conserved signaling mechanism. A few models have been proposed for  
490 the mechanism of signal transduction through the HAMP domain (Airola *et al.*, 2010; Hulko *et al.*, 2006;  
491 Parkinson, 2010; Stewart, 2014; Swain & Falke, 2007; Swain *et al.*, 2009). These models differ in many  
492 aspects but share one commonality: the HAMP domain shuttles between two distinct conformations,  
493 which represent two opposing signaling states and are stabilized by different subsets of conserved  
494 residues (Zschiedrich *et al.*, 2016). Indeed, we isolated a total of 17 point mutations from genetic  
495 selections, either constitutively activating ON (3) or inactivating OFF mutations (14), within this 50-residue  
496 HAMP domain (Figure 2). Each individual point mutation induces conformational changes sufficient for  
497 switching the signaling function to either an on or off state, which exemplifies the dynamics, flexibility,  
498 and interchangeable nature of the HAMP domain. Five hydrophobic residues identified are located at the  
499 dimer interface (I85, I88, A89, M117, and L121) and any mutations to neutral, hydrophilic, or even slightly  
500 less hydrophobic residues would drastically affect conformation of this domain resulting in loss of function  
501 (Figure 2). Thus, it is clear that these hydrophobic residues pack together in the interior of the helix bundle  
502 and stabilize protein conformation through hydrophobic interactions. Furthermore, among three  
503 constitutively ON mutations isolated from the HAMP domain, two were substitutions from neutral  
504 residues (P72 and T118) to hydrophobic residues (Leu and Ile, respectively; Figure 2). Both Leu and Ile are  
505 highly hydrophobic and custom-made for introducing additional hydrophobic effects to stabilize the  
506 kinase-competent conformation of this helix bundle. In conclusion, this and other studies demonstrated  
507 the importance of hydrophobic residues in HAMP function and the essentiality of this domain in TCS  
508 signaling.

## 509 **The kinase core: DHP and CA domains and their interaction**

510 The DHP domain forms a homodimeric antiparallel four-helix bundle with two  $\alpha$ -helices joined by  
511 a hairpin loop (Figure S1A-B). HitS possesses a HisKA subfamily DHP domain. Three catalytic reactions take  
512 place at this domain: (i) histidine autophosphorylation, (ii) phosphotransfer from HK to its cognate RR,  
513 and (iii) dephosphorylation of the phosphorylated RR. This helix bundle can be divided into three  
514 segments based on prior DHP sequence analysis (Bhate *et al.*, 2015) (Figure S1B). Below we summarize  
515 the role for each segment and the effects of mutations in that segment have on the function.

516 First, the top region serves as the binding site for the Gripper fingers of CA during  
517 autophosphorylation. It switches between symmetric and asymmetric conformations, which correlate  
518 with phosphatase-competent and kinase-competent states, respectively (Bhate *et al.*, 2015). Five ON  
519 mutations were isolated from this region (S136L, L184F, L185R, T188I, and L189P) (Figure S1B). The  
520 sidechain of S136 or T188 likely forms a hydrogen bond with the protein backbone and its substitution to  
521 a hydrophobic residue (Leu or Ile) introduces hydrophobic interactions within the four-helix bundle and  
522 enables HAMP helices to shift conformation towards a kinase-competent state. On the other hand, the  
523 hydrophobic Leu (L184, L185, or L189) was mutated to a relatively less hydrophobic (L184F), hydrophilic  
524 (L185R), or sterically restricted residue (L189P) (Figure S1B), all of which resulted in asymmetric kinase-on  
525 conformation.

526 Second, the highly symmetric central core follows immediately after the well-conserved  
527 phosphoaccepting His and functions as the docking site for the cognate RR during either phosphotransfer  
528 or dephosphorylation (Bhate *et al.*, 2015). The conserved (T/N)-P dipeptide is known to form a kink for  
529 helix bending that allows the N-terminus of the HAMP1 helix to adopt multiple conformations during  
530 signaling (Bhate *et al.*, 2015). HitS contains a Ser, the preferred substitution residue for Thr, along with a  
531 conserved Pro at this position. Either residue could be mutated (S141L or P142S) to disrupt this tight turn

532 on the protein surface and lock the kinase in a constitutively on conformation (Figure S1B). In addition,  
533 L177 located in the interior of the four-helix bundle was mutated to a much less hydrophobic Ala and this  
534 mutation also triggered sufficient conformation changes from stable symmetric to asymmetric state,  
535 indicating the involvement of L177 in the dimer interface. Furthermore, both S141L and F149L mutations  
536 disrupted the interaction of HitS with its cognate regulator HitR particularly during dephosphorylation  
537 (Figures S8C and S8E) resulting in potent activation of HitRS signaling (Figure S4D-E). These data illustrate  
538 the importance of this segment for HK-RR interactions and TCS signal transduction.

539 Third, the bottom part of the bundle is the continuity of the RR-binding interface joined by a  
540 hairpin loop. The sequence and length of this region are highly variable (Figure S1A), reflecting sequence-  
541 specific interactions for recognition of the cognate RR. In conclusion, these results strongly support prior  
542 DHp sequence analysis (Mechaly *et al*, 2014) and demonstrate that the symmetry-asymmetry transition  
543 is a key feature of signal transduction through the DHp domain.

544 The CA domain is well conserved with N, G1 (or D), F, G2, G3 sequence motifs (Figure S1A and S1C),  
545 which are all defined by the critical residues within these boxes and are all involved in ATP-binding and  
546 catalysis. In between the F and G2 boxes, a flexible loop called the ATP-lid covers the ATP-binding site  
547 (Figure S1A and S1C). The flexibility of the ATP-lid is important for ATP-binding as well as interacting with  
548 the DHp domain, which allows the CA domain to bind to different regions of DHp during multiple catalytic  
549 reactions depending on DHp conformation and the catalytic status of the CA domain (Albanesi *et al*, 2009;  
550 Marina *et al*, 2001; Marina *et al*, 2005; Trajtenberg *et al*, 2010). A Gripper helix with four hydrophobic  
551 residues named Gripper fingers, located within the G2-box (Figure S1A and S1C), was recently defined  
552 and works together with a Phe in the F-box to mediate the interaction with the DHp domain (Bhate *et al*,  
553 2015). Interestingly, most of the point mutants identified within the CA domain were located in this region:  
554 four in the ATP-lid (A300E, N305K, R306S, and G309R) and two within the Gripper helix (A316E and K320E)  
555 (Figure S1A and S1C). Each individual mutation triggers structural changes of the CA domain and the



556 interacting partners of CA and shifts the conformation equilibrium of the entire HK towards kinase-on  
557 state, highlighting the flexibility and versatility of these two motifs. Three of these mutants were  
558 characterized *in vitro*: both A300E and R306S promoted autokinase and phosphotransfer activities while  
559 G309R enhanced phosphotransfer with drastically diminished autophosphorylation. In addition, both  
560 A300E and G309R had no impact on phosphatase activity while R306S significantly disrupted  
561 dephosphorylation of the phosphorylated HitR, demonstrating the involvement of CA domain in all three  
562 catalytic activities. In conclusion, these data along with other structural analyses (Bhate *et al.*, 2015; Jacob-  
563 Dubuisson *et al.*, 2018; Zschiedrich *et al.*, 2016) support a model in which the CA domain needs to adopt  
564 several positions relative to the DHp domain during different catalytic states of the HK, and the interaction  
565 between DHp and CA domains mediated by the Gripper helix are critical for TCS signaling.

#### 566 **The receiver and DNA-binding domains of RR and regulation mechanism**

567 The receiver domains share a conserved ( $\beta\alpha$ )<sub>5</sub> fold (Figure S2A and S2C) and function as  
568 phosphorylation-dependent switches to modulate the activity of the effector domain using distinct inter-  
569 and/or intramolecular interactions in the inactive and active states (Gao *et al.*, 2007). Some RRs have been  
570 reported to dimerize in two different orientations: one involves the  $\alpha$ 4- $\beta$ 5- $\alpha$ 5 surface and the other  
571 involves the  $\alpha$ 1/ $\alpha$ 5 surface and only the  $\alpha$ 4- $\beta$ 5- $\alpha$ 5 dimer is functional upon activation (Mack *et al.*, 2009).  
572 The majority of the exposed sidechains on the  $\alpha$ 4- $\beta$ 5- $\alpha$ 5 surface are hydrophilic, suggesting that any  
573 interactions through this interface are likely to be dynamic (Barbieri *et al.*, 2010; Mack *et al.*, 2009). Indeed,  
574 two residues (F95 and P106) identified from the *reE* selection are located in this region: both mutants  
575 (F95S and P106S) were still capable of accepting phosphor signals from HitS with rather slower kinetic  
576 rates but the DNA-binding ability of both mutants was nearly abolished (Figure 7 and Table S3), indicating  
577 the dimerization step between phosphotransfer and DNA-binding is likely disrupted. The hydroxyl group  
578 in the sidechain of Ser is fairly reactive and may form hydrogen bonds with the polar residues in the  $\alpha$ 4/ $\alpha$ 5  
579 helices and disrupt the dynamics and flexibility of this  $\alpha$ 4- $\beta$ 5- $\alpha$ 5 dimer interface (Figure S2C), which in turn

580 prevents HitR from dimerizing through this interface thereby abrogating HitR activation (Figure S4-5).  
581 These data suggest the dynamics and flexibility of this  $\alpha$ 4- $\beta$ 5- $\alpha$ 5 interface may be important for RR  
582 activation through dimerization in the correct orientation. A conserved Met (M58) at two residues after  
583  $\beta$ 3 strand (Figure S2A and S2C) was identified from the *ermC* selection and its mutation to a bulky and  
584 mostly hydrophobic Ile promoted the phosphoryl group transfer from His to Asp (Figure 7). It is unclear  
585 how Ile substitution at this position facilitates phosphotransfer. There are two possibilities: (i) introducing  
586 hydrophobic residues to protein surfaces can stabilize a protein through improved water-protein  
587 interactions as reported recently (Islam *et al*, 2019), or (ii) Ile is in close proximity to the dimer interface  
588 and can facilitate dimerization through hydrophobic effects. Nonetheless, M58I substitution led to  
589 conformational changes of the receiver domain resulting in activation of the associated DNA-binding  
590 domain and downstream gene transcription (Figure S4K and S6).

591 RRs with DNA-binding domains can be categorized into four subfamilies: OmpR/PhoB, NarL/FixJ,  
592 NtrC/DctD, and LytR/AgrA. HitR belongs to the largest OmpR/PhoB subfamily with a conserved winged  
593 helix-turn-helix fold (Figure S2D). Helix  $\alpha$ 8 and the last two  $\beta$ -strands ( $\beta$ 9/ $\beta$ 10) are critical for DNA-binding:  
594  $\alpha$ 8 helix recognizes the specific DNA sequence and inserts into the major groove of DNA while the  $\beta$ -  
595 hairpin ( $\beta$ 9/ $\beta$ 10) binds in the minor DNA groove (Blanco *et al*, 2002). Two residues were identified within  
596 the  $\alpha$ 8 helix by the genetic selections: R192 and E203 and one residue within strand  $\beta$ 10: Y222. The  
597 sidechains of both polar residues (R192 and E203) likely participate in hydrogen bonding with specific  
598 bases in the major DNA groove. Interestingly, substitution of R192 to a hydrophobic Cys led to complete  
599 loss of DNA-binding while mutation of E203 to a hydrophobic Ala enhanced DNA-binding with a 10-fold  
600 increase in binding affinity compared to WT (Figure 7). Hydrophobic residues (Cys and Ala) can also  
601 interact with DNA bases and stabilize protein-DNA complexes through hydrophobic interactions although  
602 the completely opposite effects of these two mutations seemed counterintuitive. However, R192C  
603 disrupted phosphotransfer while E203A showed no evident effects on phosphotransfer, indicating that

604 R192 but not E203 in helix  $\alpha$ 8 of the DNA-binding domain may interact with the receiver domain and  
605 facilitate transfer of the phosphoryl group from HK to RR. R192C mutation disrupted this interaction  
606 leading to diminished phosphotransfer and abolished DNA-binding while E203A enhanced DNA-binding  
607 likely through hydrophobic effects. Y222 is located only six residues away from the C-terminus of HitR,  
608 however, its substitution to acidic Asp drastically disrupted the  $\beta$ -strand conformation and led to protein  
609 instability and complete loss of DNA-binding (Figure 3B and 7E, Table S3). This mutant was still able to  
610 receive phosphoryl group from HK with a lower kinetic rate (Figure 7A-D), indicating that the  $\beta$ -hairpin  
611 may be not involved in phosphotransfer but might play a critical role in DNA-binding.

612 Collectively, this study provides a detailed characterization and structure-function analysis of an  
613 entire TCS, defines molecular determinants of each domain for both HK and RR, reveals residues critical  
614 for various activities intrinsic to TCSs, uncovers interaction specificity among different domains and  
615 between the HK and RR, and extends our understanding of the molecular basis of signal transduction  
616 through TCSs. In addition, all constitutively ON point mutants identified within these two well-conserved  
617 signaling proteins could be useful for studying fundamental mechanisms of signaling in other TCSs with  
618 unknown targets or unknown partners. These ON mutations could also serve as a blueprint for developing  
619 biotechnology tools suitable for synthetic biology engineering that connects sensory modules with  
620 signaling outputs (Ninfa, 2010). Given that antibiotic resistance is one of the most significant threats to  
621 global health, novel antimicrobial therapeutics are in desperate need. It is reasonable to think that the  
622 well conserved HAMP domain found in many sensor and chemotaxis proteins could be the top target for  
623 rational inhibitor design to disrupt the hydrophobic interactions within the four-helix bundle and disrupt  
624 the signal transmission that is required for many biological processes. This study along with other findings  
625 pave the way for developing novel antimicrobials or adjunctive treatments that target signal transduction  
626 in infectious pathogens.

627

628 **Materials and Methods**

629 Materials and methods are described in the SI Appendix, including growth conditions, DNA manipulation  
630 and strain construction, genetic selections, growth curves, qRT-PCR, homology modeling, protein  
631 expression and purification, size exclusion chromatography, autophosphorylation assay, phosphotransfer  
632 assay, dephosphorylation assay, EMSA, and microscale thermophoresis assay.

633

634 **Acknowledgments:** We thank Jocelyn Simpson for her help on *ermC* selection. We thank Dr. Heather Kroh  
635 for her technical advice and Dr. Maria Hadjifrangiskou for sharing the GST-PmrBc construct. We thank  
636 members of the Skaar Laboratory for critical comments of the manuscript. M.L.C, S.J.I, C.J.L, A.M.T, S.M.C,  
637 G.H.H, H.K.L, J.D.R and D.L.S. were supported by the Grove City College Swezey Fund and the Jewell,  
638 Moore, and MacKenzie Fund. Work in the Skaar Lab was funded by National Institutes of Health grant R01  
639 AI73843 to E.P.S and H.P. was supported by T32 HL094296.

640

641 **Conflict of Interests:** The authors declare that they have no conflict of interest.

642

643 **Author Contributions:** H.P. and E.P.S. conceived and designed the experiments, H.P. acquired all  
644 experimental data exclusive of *B. anthracis* strain construction and genetic selections. M.L.C, S.J.I, C.J.L,  
645 A.M.T, S.M.C, G.H.H, H.K.L, J.D.R and D.L.S. constructed *B. anthracis* strains used for genetic selections  
646 and the chromosomal *hitRS* point-mutants. M.L.C, C.J.L, and D.L.S. conducted genetic selections. H.P.  
647 drafted the manuscript, HP, D.L.S, and E.P.S edited the manuscript, and all authors reviewed the  
648 manuscript.

649

650 **References**

- 651 Airola MV, Watts KJ, Bilwes AM, Crane BR (2010) Structure of concatenated HAMP domains provides a  
652 mechanism for signal transduction. *Structure* 18: 436-448
- 653 Albanesi D, Martin M, Trajtenberg F, Mansilla MC, Haouz A, Alzari PM, de Mendoza D, Buschiazzo A (2009)  
654 Structural plasticity and catalysis regulation of a thermosensor histidine kinase. *Proc Natl Acad Sci U S A*  
655 106: 16185-16190
- 656 Ames P, Zhou Q, Parkinson JS (2008) Mutational Analysis of the Connector Segment in the HAMP Domain  
657 of Tsr, the *Escherichia coli* Serine Chemoreceptor. *Journal of Bacteriology* 190: 6676-6685
- 658 Appleman JA, Chen LL, Stewart V (2003) Probing conservation of HAMP linker structure and signal  
659 transduction mechanism through analysis of hybrid sensor kinases. *J Bacteriol* 185: 4872-4882
- 660 Barbieri CM, Mack TR, Robinson VL, Miller MT, Stock AM (2010) Regulation of response regulator  
661 autophosphorylation through interdomain contacts. *J Biol Chem* 285: 32325-32335
- 662 Batchelor E, Goulian M (2003) Robustness and the cycle of phosphorylation and dephosphorylation in a  
663 two-component regulatory system. *Proc Natl Acad Sci U S A* 100: 691-696
- 664 Bhate MP, Molnar KS, Goulian M, DeGrado WF (2015) Signal transduction in histidine kinases: insights  
665 from new structures. *Structure* 23: 981-994
- 666 Blanco AG, Sola M, Gomis-Ruth FX, Coll M (2002) Tandem DNA recognition by PhoB, a two-component  
667 signal transduction transcriptional activator. *Structure* 10: 701-713
- 668 Brunskill EW, Bayles KW (1996) Identification and molecular characterization of a putative regulatory locus  
669 that affects autolysis in *Staphylococcus aureus*. *J Bacteriol* 178: 611-618
- 670 Fournier B, Klier A (2004) Protein A gene expression is regulated by DNA supercoiling which is modified  
671 by the ArlS-ArlR two-component system of *Staphylococcus aureus*. *Microbiology* 150: 3807-3819
- 672 Gao R, Mack TR, Stock AM (2007) Bacterial response regulators: versatile regulatory strategies from  
673 common domains. *Trends Biochem Sci* 32: 225-234

674 Giraudo AT, Cheung AL, Nagel R (1997) The sae locus of *Staphylococcus aureus* controls exoprotein  
675 synthesis at the transcriptional level. *Arch Microbiol* 168: 53-58

676 Goel AK (2015) Anthrax: A disease of biowarfare and public health importance. *World J Clin Cases* 3: 20-  
677 33

678 Gushchin I, Melnikov I, Polovinkin V, Ishchenko A, Yuzhakova A, Buslaev P, Bourenkov G, Grudinin S, Round  
679 E, Balandin T *et al* (2017) Mechanism of transmembrane signaling by sensor histidine kinases. *Science* 356

680 Hoch JA (2017) A Life in *Bacillus subtilis* Signal Transduction. *Annual Review of Microbiology* 71: 1-19

681 Hulko M, Berndt F, Gruber M, Linder JU, Truffault V, Schultz A, Martin J, Schultz JE, Lupas AN, Coles M  
682 (2006) The HAMP domain structure implies helix rotation in transmembrane signaling. *Cell* 126: 929-940

683 Islam MM, Kobayashi K, Kidokoro SI, Kuroda Y (2019) Hydrophobic surface residues can stabilize a protein  
684 through improved water-protein interactions. *Febs j* 286: 4122-4134

685 Jacob-Dubuisson F, Mechaly A, Betton JM, Antoine R (2018) Structural insights into the signalling  
686 mechanisms of two-component systems. *Nat Rev Microbiol* 16: 585-593

687 Kamal SM, Rashid AK, Bakar MA, Ahad MA (2011) Anthrax: an update. *Asian Pac J Trop Biomed* 1: 496-501

688 Kato A, Groisman EA (2004) Connecting two-component regulatory systems by a protein that protects a  
689 response regulator from dephosphorylation by its cognate sensor. *Genes Dev* 18: 2302-2313

690 Kelley LA, Mezulis S, Yates CM, Wass MN, Sternberg MJE (2015) The Phyre2 web portal for protein  
691 modeling, prediction and analysis. *Nature Protocols* 10: 845-858

692 Klubes P, Fay PJ, Cerna I (1971) Effect of chlorpromazine on cell wall biosynthesis and incorporation of  
693 orotic acid into nucleic acids in *Bacillus megaterium*. *Biochem Pharmacol* 20: 265-277

694 Krishnakumar SS, London E (2007) The control of transmembrane helix transverse position in membranes  
695 by hydrophilic residues. *Journal of molecular biology* 374: 1251-1269

696 Laut CL, Perry WJ, Metzger AL, Weiss A, Stauff DL, Walker S, Caprioli RM, Skaar EP (2020) *Bacillus anthracis*  
697 Responds to Targocil-Induced Envelope Damage through EdsRS Activation of Cardiolipin Synthesis. *mBio*  
698 11: e03375-03319

699 Lee K, Campbell J, Swoboda JG, Cuny GD, Walker S (2010) Development of improved inhibitors of wall  
700 teichoic acid biosynthesis with potent activity against *Staphylococcus aureus*. *Bioorg Med Chem Lett* 20:  
701 1767-1770

702 Lee S, Hinz A, Bauerle E, Angermeyer A, Juhaszova K, Kaneko Y, Singh PK, Manoil C (2009) Targeting a  
703 bacterial stress response to enhance antibiotic action. *Proc Natl Acad Sci U S A* 106: 14570-14575

704 Letunic I, Bork P (2017) 20 years of the SMART protein domain annotation resource. *Nucleic Acids*  
705 *Research* 46: D493-D496

706 Li J, Swanson RV, Simon MI, Weis RM (1995) The response regulators CheB and CheY exhibit competitive  
707 binding to the kinase CheA. *Biochemistry* 34: 14626-14636

708 Mack TR, Gao R, Stock AM (2009) Probing the roles of the two different dimers mediated by the receiver  
709 domain of the response regulator PhoB. *J Mol Biol* 389: 349-364

710 Marina A, Mott C, Auyzenberg A, Hendrickson WA, Waldburger CD (2001) Structural and mutational  
711 analysis of the PhoQ histidine kinase catalytic domain. Insight into the reaction mechanism. *J Biol Chem*  
712 276: 41182-41190

713 Marina A, Waldburger CD, Hendrickson WA (2005) Structure of the entire cytoplasmic portion of a sensor  
714 histidine-kinase protein. *Embo j* 24: 4247-4259

715 Martin PK, Li T, Sun D, Biek DP, Schmid MB (1999) Role in cell permeability of an essential two-component  
716 system in *Staphylococcus aureus*. *J Bacteriol* 181: 3666-3673

717 Mascher T (2006) Intramembrane-sensing histidine kinases: a new family of cell envelope stress sensors  
718 in Firmicutes bacteria. *FEMS Microbiol Lett* 264: 133-144

719 Mascher T (2014) Bacterial (intramembrane-sensing) histidine kinases: signal transfer rather than stimulus  
720 perception. *Trends Microbiol* 22: 559-565

721 Mechaly AE, Sassoon N, Betton J-M, Alzari PM (2014) Segmental Helical Motions and Dynamical  
722 Asymmetry Modulate Histidine Kinase Autophosphorylation. *PLOS Biology* 12: e1001776

723 Mike LA, Choby JE, Brinkman PR, Olive LQ, Dutter BF, Ivan SJ, Gibbs CM, Sulikowski GA, Stauff DL, Skaar  
724 EP (2014) Two-component system cross-regulation integrates *Bacillus anthracis* response to heme and  
725 cell envelope stress. *PLoS Pathog* 10: e1004044

726 Mike LA, Dutter BF, Stauff DL, Moore JL, Vitko NP, Aranmolate O, Kehl-Fie TE, Sullivan S, Reid PR, DuBois  
727 JL *et al* (2013) Activation of heme biosynthesis by a small molecule that is toxic to fermenting  
728 *Staphylococcus aureus*. *Proc Natl Acad Sci U S A* 110: 8206-8211

729 Narayanan A, Kumar S, Evrard AN, Paul LN, Yernool DA (2014) An asymmetric heterodomain interface  
730 stabilizes a response regulator-DNA complex. *Nat Commun* 5: 3282

731 Ninfa AJ (2010) Use of two-component signal transduction systems in the construction of synthetic genetic  
732 networks. *Current opinion in microbiology* 13: 240-245

733 Ooi N, Eady EA, Cove JH, O'Neill AJ (2015) Redox-active compounds with a history of human use:  
734 antistaphylococcal action and potential for repurposing as topical antibiofilm agents. *J Antimicrob*  
735 *Chemother* 70: 479-488

736 Parkinson JS (2010) Signaling mechanisms of HAMP domains in chemoreceptors and sensor kinases. *Annu*  
737 *Rev Microbiol* 64: 101-122

738 Poole K (2014) Stress responses as determinants of antimicrobial resistance in *Pseudomonas aeruginosa*:  
739 multidrug efflux and more. *Can J Microbiol* 60: 783-791

740 Recsei P, Kreiswirth B, O'Reilly M, Schlievert P, Gruss A, Novick RP (1986) Regulation of exoprotein gene  
741 expression in *Staphylococcus aureus* by agar. *Mol Gen Genet* 202: 58-61



- 742 Shatalin K, Gusarov I, Avetissova E, Shatalina Y, McQuade LE, Lippard SJ, Nudler E (2008) *Bacillus anthracis*-  
743 derived nitric oxide is essential for pathogen virulence and survival in macrophages. *Proceedings of the*  
744 *National Academy of Sciences* 105: 1009-1013
- 745 Stauff DL, Skaar EP (2009) *Bacillus anthracis* HsrRS signalling to HrtAB regulates haem resistance during  
746 infection. *Mol Microbiol* 72: 763-778
- 747 Stewart V (2014) The HAMP signal-conversion domain: static two-state or dynamic three-state? *Mol*  
748 *Microbiol* 91: 853-857
- 749 Stock AM, Robinson VL, Goudreau PN (2000) Two-component signal transduction. *Annu Rev Biochem* 69:  
750 183-215
- 751 Swain KE, Falke JJ (2007) Structure of the conserved HAMP domain in an intact, membrane-bound  
752 chemoreceptor: a disulfide mapping study. *Biochemistry* 46: 13684-13695
- 753 Swain KE, Gonzalez MA, Falke JJ (2009) Engineered socket study of signaling through a four-helix bundle:  
754 evidence for a yin-yang mechanism in the kinase control module of the aspartate receptor. *Biochemistry*  
755 48: 9266-9277
- 756 Tierney AR, Rather PN (2019) Roles of two-component regulatory systems in antibiotic resistance. *Future*  
757 *Microbiol* 14: 533-552
- 758 Tkachenko AG (2018) Stress Responses of Bacterial Cells as Mechanism of Development of Antibiotic  
759 Tolerance (Review). *Applied Biochemistry and Microbiology* 54: 108-127
- 760 Trajtenberg F, Grana M, Ruetalo N, Botti H, Buschiazzi A (2010) Structural and enzymatic insights into the  
761 ATP binding and autophosphorylation mechanism of a sensor histidine kinase. *J Biol Chem* 285: 24892-  
762 24903
- 763 Tsirigos KD, Peters C, Shu N, Kall L, Elofsson A (2015) The TOPCONS web server for consensus prediction  
764 of membrane protein topology and signal peptides. *Nucleic Acids Res* 43: W401-407

765 Wang C, Sang J, Wang J, Su M, Downey JS, Wu Q, Wang S, Cai Y, Xu X, Wu J *et al* (2013) Mechanistic insights  
766 revealed by the crystal structure of a histidine kinase with signal transducer and sensor domains. *PLoS Biol*  
767 11: e1001493

768 Watanakunakorn C (1984) Mode of action and in-vitro activity of vancomycin. *J Antimicrob Chemother* 14  
769 Suppl D: 7-18

770 Yang J, Zhang Y (2015) I-TASSER server: new development for protein structure and function predictions.  
771 *Nucleic Acids Res* 43: W174-181

772 Yarwood JM, McCormick JK, Schlievert PM (2001) Identification of a novel two-component regulatory  
773 system that acts in global regulation of virulence factors of *Staphylococcus aureus*. *J Bacteriol* 183: 1113-  
774 1123

775 Zhu Y, Inouye M (2003) Analysis of the role of the EnvZ linker region in signal transduction using a chimeric  
776 Tar/EnvZ receptor protein, Tez1. *J Biol Chem* 278: 22812-22819

777 Zschiedrich CP, Keidel V, Szurmant H (2016) Molecular Mechanisms of Two-Component Signal  
778 Transduction. *J Mol Biol* 428: 3752-3775

779

780

781

782

783

784

785

786

787 **Figure legends**

788 **Figure 1. Genetic selection strategies to study HitRS signaling mechanism.**

789 (A) Schematics of the modular structure of a prototypical TCS. A classic histidine kinase (HK) consists of  
790 five domains: a N-terminal Trans-Membrane domain (TM), a sensor domain, a HAMP domain, a DHP  
791 domain, and a CA domain while a response regulator (RR) consists of two domains: a receiver domain and  
792 a DNA-binding domain. (B) Schematics for genetic selection strategies. To identify mutations that lead to  
793 constitutive activation of HitRS, an *ermC* strain shown in orange driven by a HitR-targeted promoter ( $P_{hit}$ )  
794 was used. The two strains shown in blue (*relE* strains) were employed to isolate inactivating mutations  
795 within the TCS genes. (C) Growth kinetics of *ermC* expressing strains (WT and a representative activating  
796 mutant HitS:S136A) were monitored in the presence or absence of 20  $\mu\text{g ml}^{-1}$  of erythromycin. (D) Growth  
797 kinetics of *relE* expressing strains (WT and a representative inactivating mutant HitS:M117V) were  
798 monitored in the presence or absence of 20  $\mu\text{M}$  '205.

799 **Figure 2. Essentiality of HAMP domain for signal transduction**

800 (A) Multiple HAMP sequences from various histidine kinases, methylated chemotaxis receptors, and  
801 adenylyl cyclases were aligned to display the sequence property and conservation pattern of this domain.  
802 The two HAMP helices are underlined. The hydrophobic residues at the *a* and *d* positions of the heptad  
803 repeat pattern are highlighted in yellow and the residue in HAMP sequence that has been previously  
804 reported to be essential for signaling is shown in a box. The residues identified from genetic selections are  
805 highlighted in either orange or blue to specify either ON or OFF mutations, respectively. The residue Pro  
806 (P84) that can be mutated to either kinase ON or OFF state is highlighted in red. The sequences are the  
807 following: HitS, *B. anthracis*; Af1503, *Archaeoglobus fulgidus*; Tar, *Escherichia coli*; PhoQ, *E. coli*; CpxA, *E.*  
808 *coli*; EnvZ, *E. coli*; NarX, *E. coli*; Tsr, *E. coli*; Aer, *E. coli*; Rv3645, *Mycobacterium tuberculosis*; Lmo1061,  
809 *Listeria monocytogenes*; Vp0117, *Vibrio parahaemolyticus*. (B) All mutations isolated from genetic

810 selections: OFF mutations are shown in blue while ON mutations are shown in orange. (C) All mutations  
811 are mapped onto the homology model of this domain. (D) All mutations were categorized into three  
812 groups based on their location in the homodimeric four-helix bundle.

### 813 **Figure 3. Critical residues within HitRS stabilize protein and facilitate dimerization**

814 To evaluate the effects of HitR and HitS mutations on protein stability and dimerization, WT and mutant  
815 proteins were loaded onto SDS-PAGE (A, B) or native gels (C, D). Results shown are WT proteins and all  
816 mutants of HitS (A, C) or HitR (B, D) selected for further biochemical characterization. (F) Three HitR  
817 mutants affected protein dimerization as determined by size exclusion chromatography. Mutations that  
818 affect either protein stability or dimerization are mapped onto the homology models of HitS (E) or HitR  
819 (G). HitR model was generated based on *M. tuberculosis* RegX3 (PDB ID: 2OQR), which is in an active dimer  
820 form, and only a monomer was shown.

### 821 **Figure 4. The autokinase activity of HitS can be modulated in four different manners**

822 To evaluate the effects of mutations on HitS kinase activity, the autophosphorylation efficiency of HitS WT  
823 and mutants was investigated. (A) Representative phosphor-images (top panel) to show  
824 autophosphorylation of HitS WT and mutants that were incubated with ATP [ $\gamma$ - $^{32}$ P] for 30 min and  
825 quantified using a phosphoimager. The bottom panel is to show the amount of protein used for each  
826 reaction in an SDS-PAGE gel. The intensity of the phosphorylation signal was quantified and four  
827 independent experiments are shown in (B) (mean  $\pm$  SEM). Significant differences between WT and each  
828 mutant are determined by two-tailed t-test, where  $*P < 0.05$ ,  $**P < 0.01$ ,  $***P < 0.001$ , and  $****P < 0.0001$ .  
829 (C) Representative phosphor-images to show the kinetics of autophosphorylation by HitS WT or mutants,  
830 which was monitored for 15 min. (D) Mutations that affect autophosphorylation are mapped onto a HitS  
831 model. (E, F) To better visualize the effects of mutations on HitS autokinase activity, the intensity of the  
832 phosphor-signal at different timepoints was quantified and three independent experiments are presented

833 in (E, F) (mean  $\pm$  SEM). Mutants were organized into two graphs based on their autokinase activity. Data  
834 of the first four timepoints (i.e., 0, 1, 2, and 3 min) in E and F were used for slope determination by linear  
835 regression analysis.

#### 836 **Figure 5. Phosphotransfer is the rate limiting step for signal transduction**

837 To evaluate the effects of HitS mutation on transferring the phosphorylation signal, phosphotransfer  
838 efficiency of HitS WT or mutants to HitR WT was examined. (A) Representative phosphor images to show  
839 the kinetics of phosphotransfer from HitS WT or constitutively activating mutants to HitR WT, which was  
840 monitored for 15 min. (B) Mutations tested are mapped onto a HitS model. (C) The intensity of the lower  
841 band (signal transferred) was quantified and relative phospho-signal transferred at different time-points  
842 was calculated. Data shown in (C) are from three independent replicates (mean  $\pm$  SEM). Significant  
843 differences determined by two-tailed t-test were observed between WT and each individual activating  
844 mutant, where  $*P < 0.05$ ,  $**P < 0.01$ , and  $***P < 0.001$ .

#### 845 **Figure 6. Critical residues required for the phosphatase activity of HitS**

846 To evaluate the effects of HitS mutation on its phosphatase activity, dephosphorylation efficiency of HitS  
847 WT and mutants was tested. (A) Representative phospho-images showing the dephosphorylation kinetics  
848 of HitS WT or mutants using HitR WT, which was monitored for 60 min. (B) Mutants with altered  
849 phosphatase activity were mapped onto the HitS model. (C-E) The intensity of phospho-signal was  
850 quantified and relative phospho-signal remaining at different time-points was calculated. Data shown are  
851 three independent replicates (mean  $\pm$  SEM). Mutants were organized into three graphs for optimal  
852 visualization. Data of the first four timepoints (i.e., 0, 1, 3, 6 min) for each protein were used for slope  
853 determination by linear regression analysis.

#### 854 **Figure 7. Residues essential for HitR activation and specific interaction within HitR**

855 To examine the effects of HitR mutations on signal reception and DNA-binding, the phosphotransfer  
856 efficiency and DNA-binding affinity of HitR WT or mutants were tested. (A, B) Phosphotransfer efficiency  
857 from HitS WT to HitR WT or mutants was quantified. (A) The top is a representative phosphor image and  
858 the bottom is an SDS-PAGE gel showing the amount of protein used for each reaction. The intensity of  
859 radioactive signal was quantified and averages from four independent experiments are shown in (B)  
860 (mean  $\pm$  SEM). Statistical significance was determined by two-tailed *t*-test, where  $*P < 0.05$ . (C) Kinetics  
861 of phosphotransfer from HitS WT to HitR WT or mutants was monitored for 30 min. Representative images  
862 are shown. The intensity of the lower band (phosphotransferred) at each timepoint was quantified.  
863 Presented are averages from three independent replicates (D) (mean  $\pm$  SEM). (E) Representative images  
864 to show DNA-binding of HitR WT or mutants to its target promoter evaluated by electrophoretic mobility  
865 shift assay (EMSA). (F) The band intensity of unshifted DNA probe (lower band) was quantified using  
866 GelQuantNET. All data points from three independent experiments were plotted and subjected to  $K_d$   
867 determination using GraphPad Prism 8 (mean  $\pm$  SEM). (G) All point mutants tested are mapped onto a  
868 HitR structure model. All blue colors indicate OFF mutation while orange colors indicate ON mutation.

869

870

871

872

873

874

875

876

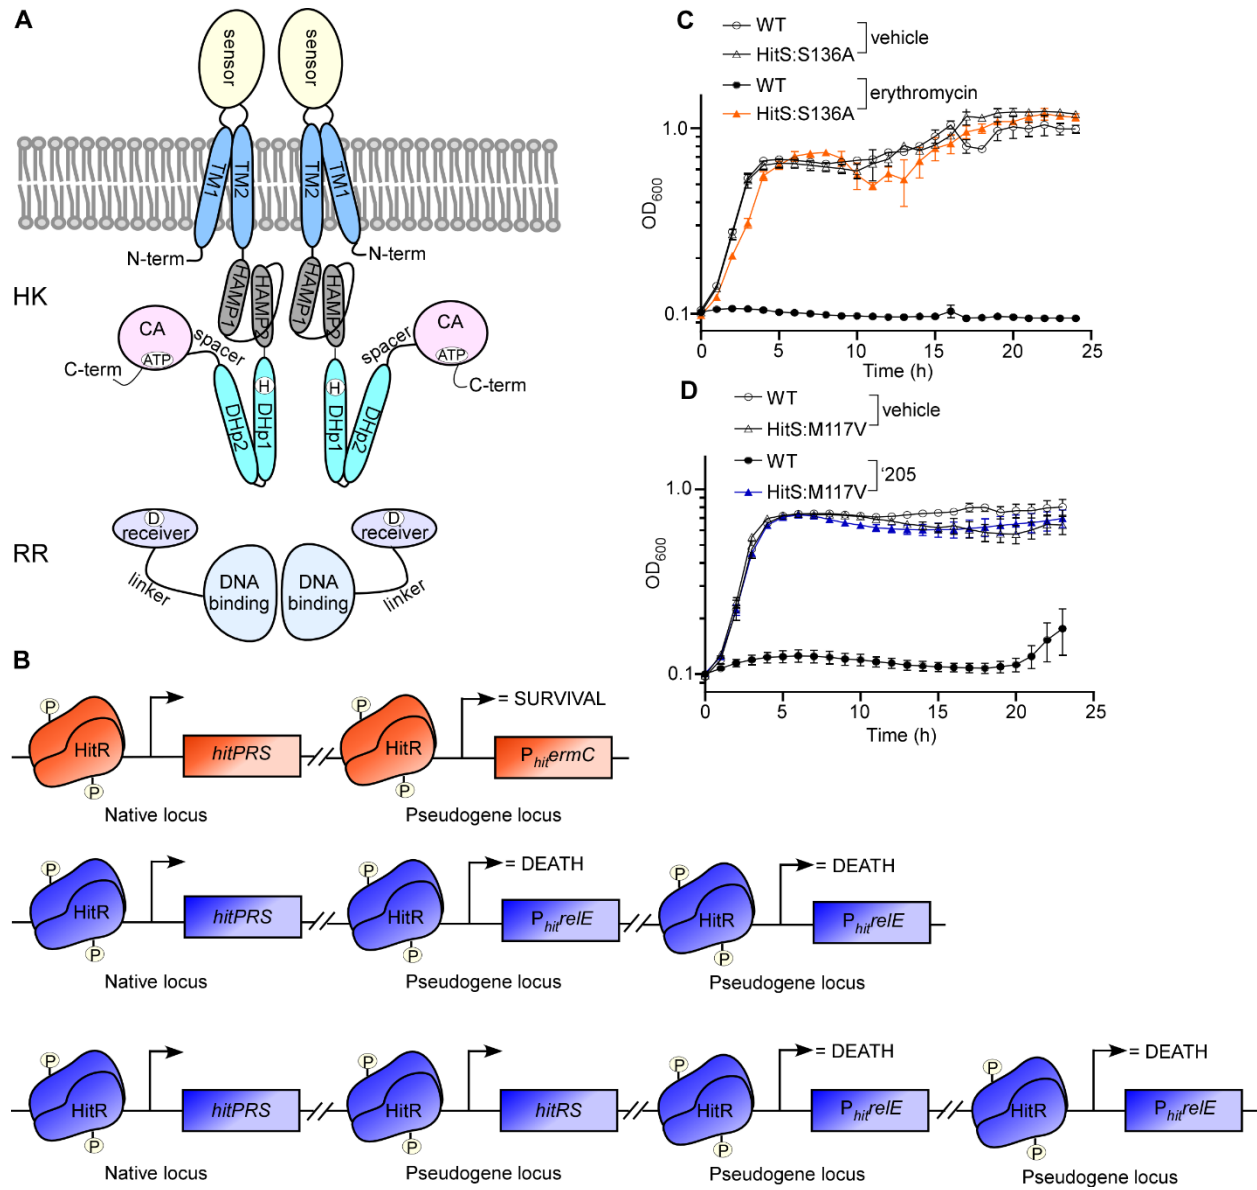

877

878

879 **Figure 1. Genetic selection strategies to study HitRS signaling mechanism**

**A**

|         |     | HAMP1                                                                                                                     | HAMP2     |  |
|---------|-----|---------------------------------------------------------------------------------------------------------------------------|-----------|--|
| HitS    | 66  | I A V L M R P K R E A M I W T I I E P T Q K T A K G D F S V K I R N E E K Y D G E I G V L V K S I N D M T D E L N A ---   | 122       |  |
| Af1503  | 278 | - S T I T R P T I - - - - I E L S N T A D K T A E G N L E A E V P - H Q N R A D E I G I L A K S I E R L R R S L K V A M E | 331       |  |
| Tar     | 214 | - R M L L T P L I - - - - A K I I A H T R E I A G G N L A N T L T I D - - G R S E M G D L A Q S V S H M Q R S L T D T V T | 266       |  |
| PhoQ    | 217 | - - - S L R P I I - - - - E A L A K E V R E L E E H N R E L L N P - - - A T T R E L T S L V R N L N R L L K S E R E R Y D | 266       |  |
| CpxA    | 185 | - - S L A K P A - - - - R K L K N A A D E V A Q G N L R Q H P E - L E A G P Q E F L A A G A S F N Q M M V T A L E R M M   | 236       |  |
| EnvZ    | 180 | - R I Q N R P L I - - - - V D L E H A A L Q V G K G I I P P - P L - R E Y G A S E V R S V T R A F N H M A A G V K Q L A D | 232       |  |
| NarX    | 176 | - A R L L Q P W I - - - - R Q L L A M A S A V S H R D F T Q R A N I S - - G R N E M A M I G T A L N N M S A E L A E S Y A | 228       |  |
| Tsr     | 216 | - A S L V A P M I - - - - N R L I D S T R H I A G G D L V K P I E V D - - G S N E M G Q L A E S L R H M Q G E L M R T V G | 268       |  |
| Aer     | 206 | - W Q I V R P I I - - - - E N V A H Q A L K V A T G E - R N S V E - H L N R S D E L G L T L R A V G Q L G L M C R W - - - | 255       |  |
| Rv3645  | 278 | - M S I A D P L I - - - - R Q L R W A T S E V Q R G N Y N A H M Q - - I Y D A S E L G L L Q A G F N D M V R E L S E R Q R | 330       |  |
| Lmo1061 | 189 | - R R M V R P L I - - - - L R M N K V A S K M A N L N F T E V L P - - I T S K D E I G Q L S G N L N E M A I N L E K T M L | 241       |  |
| Vp0117  | 368 | - E R V T R P I I - - - - N A T A D A A Q H L A N G D W D S S M P - Q P G R V Y E T T V L A K A F N E M A S N L K A S F K | 421       |  |
|         |     | d a : d a d                                                                                                               | a d a d a |  |

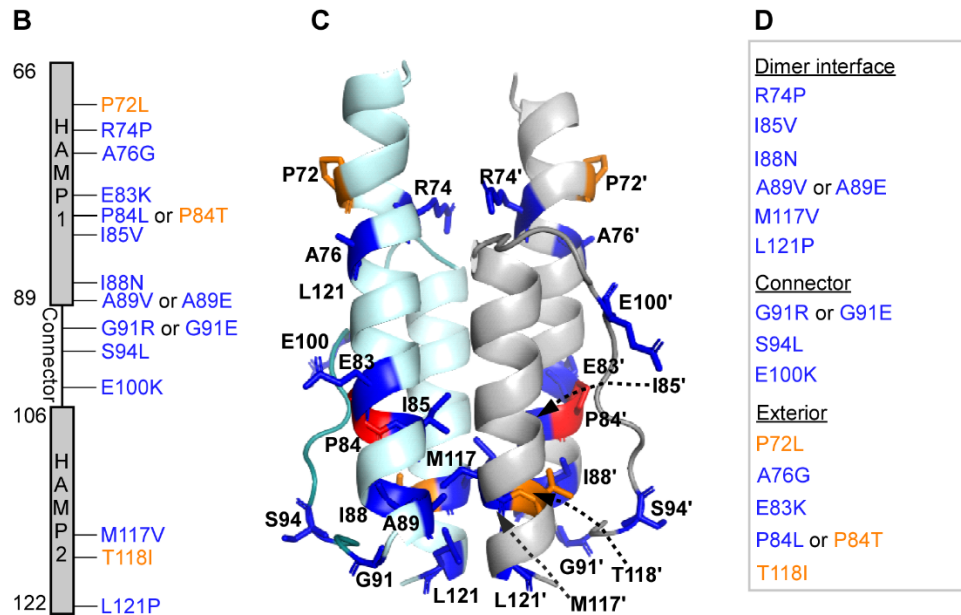

880

881

882 **Figure 2. Essentiality of HAMP domain for signal transduction**

883



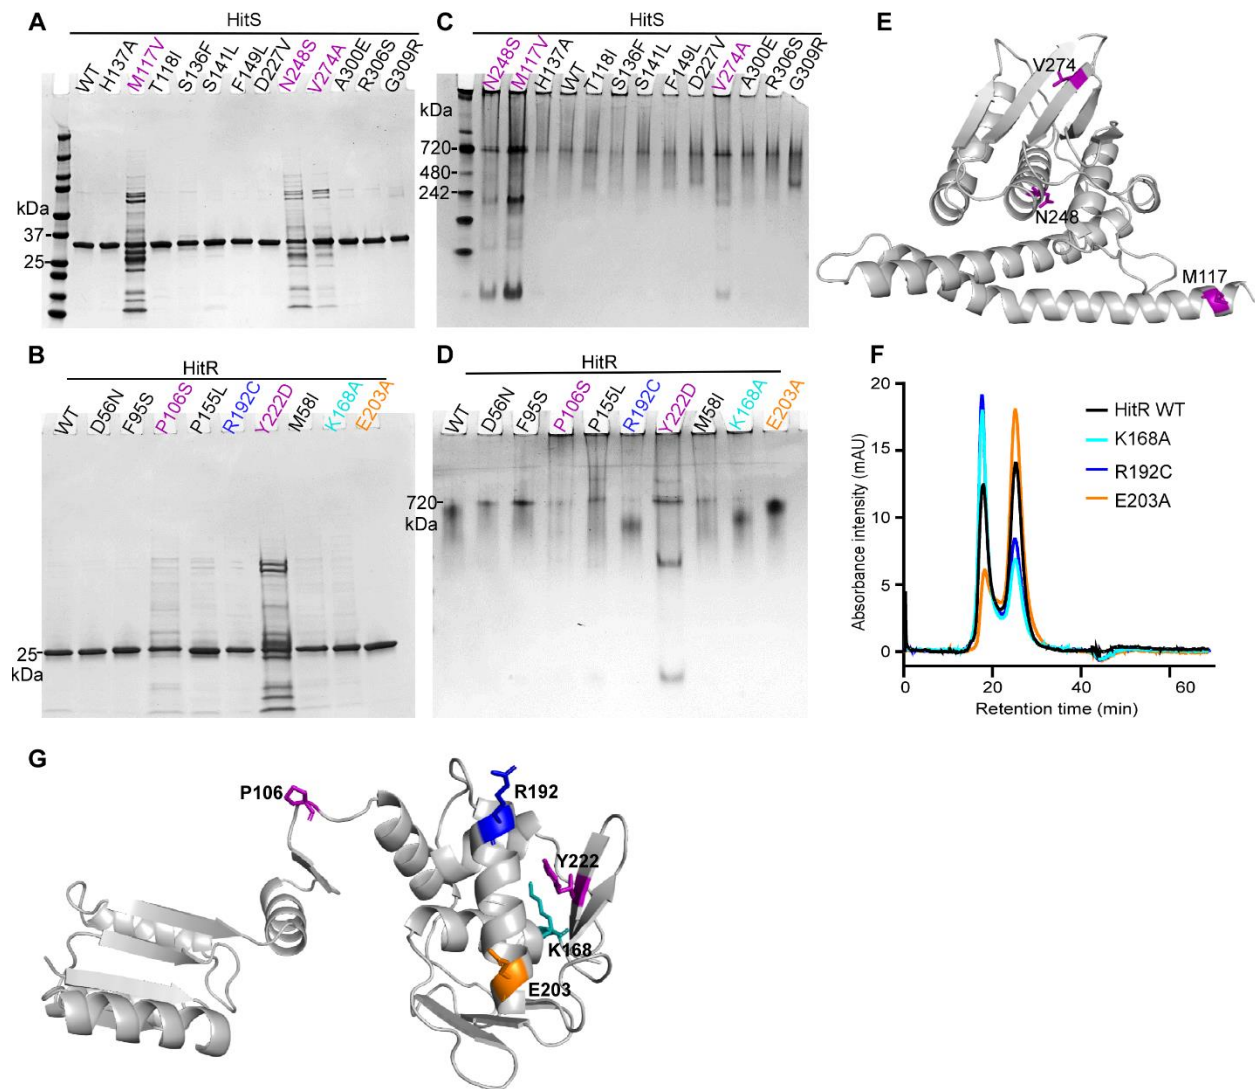

884

885 **Figure 3. Critical residues within HitRS stabilize protein and facilitate dimerization**

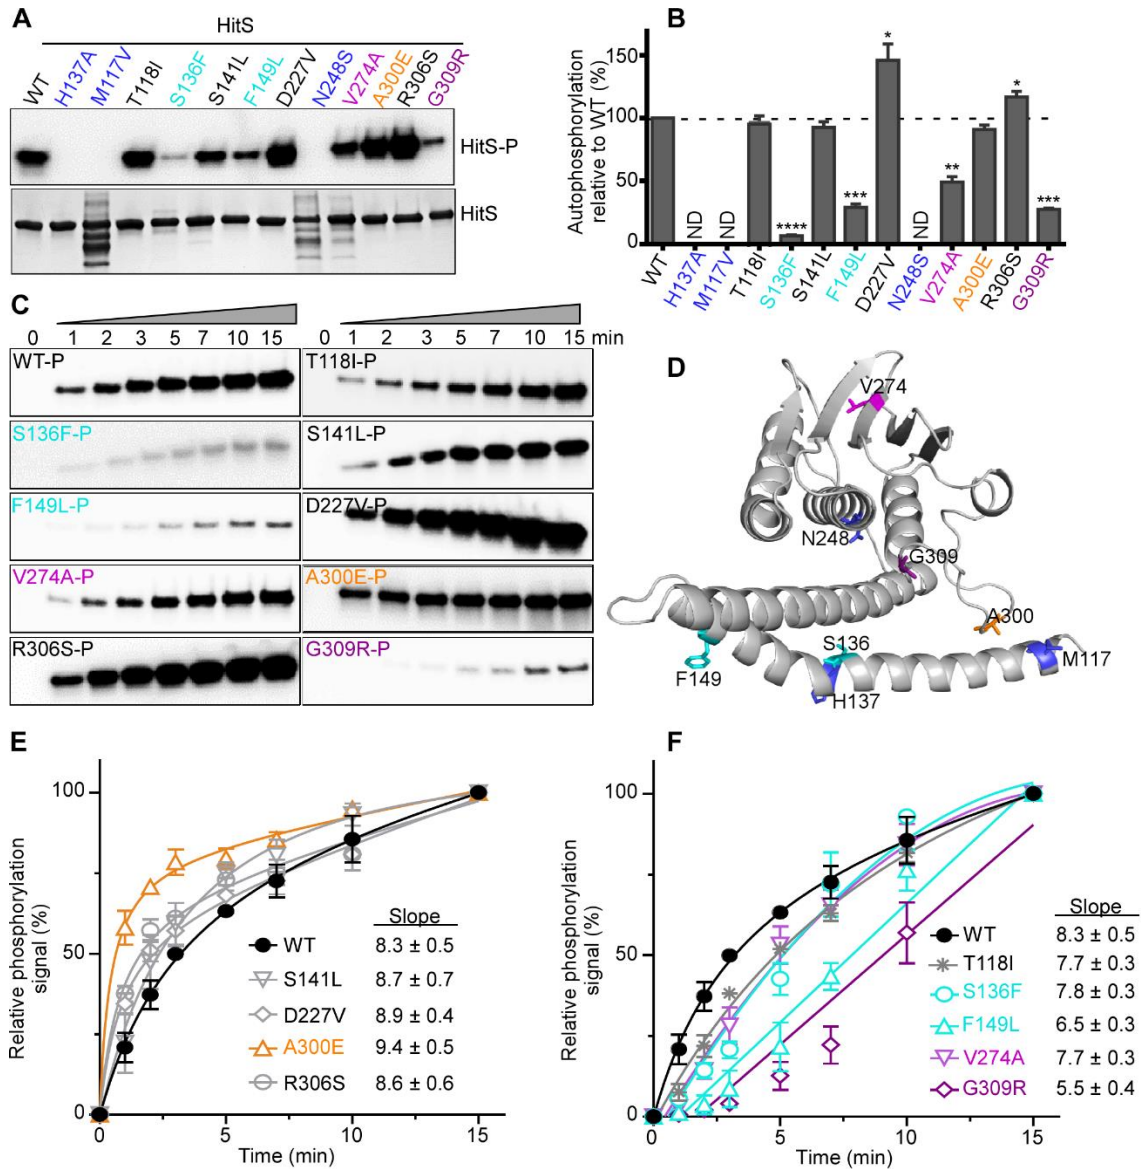

886

887 **Figure 4. The autokinase activity of HitS can be modulated in four different manners**

888

889

890

891

892

893

894

895

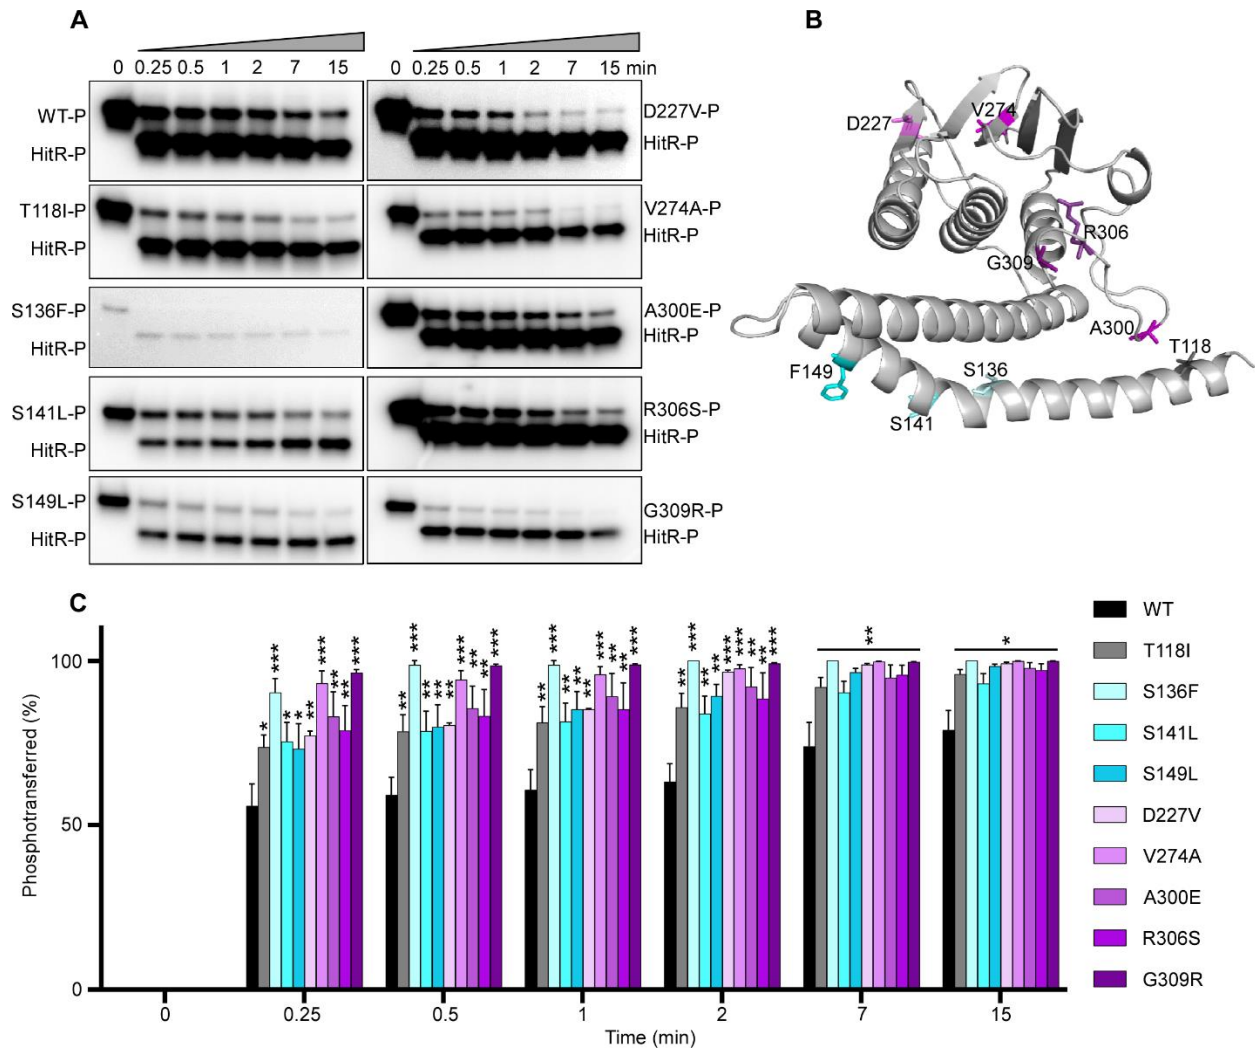

896

897 **Figure 5. Phosphotransfer is the rate limiting step for signal transduction**

898

899

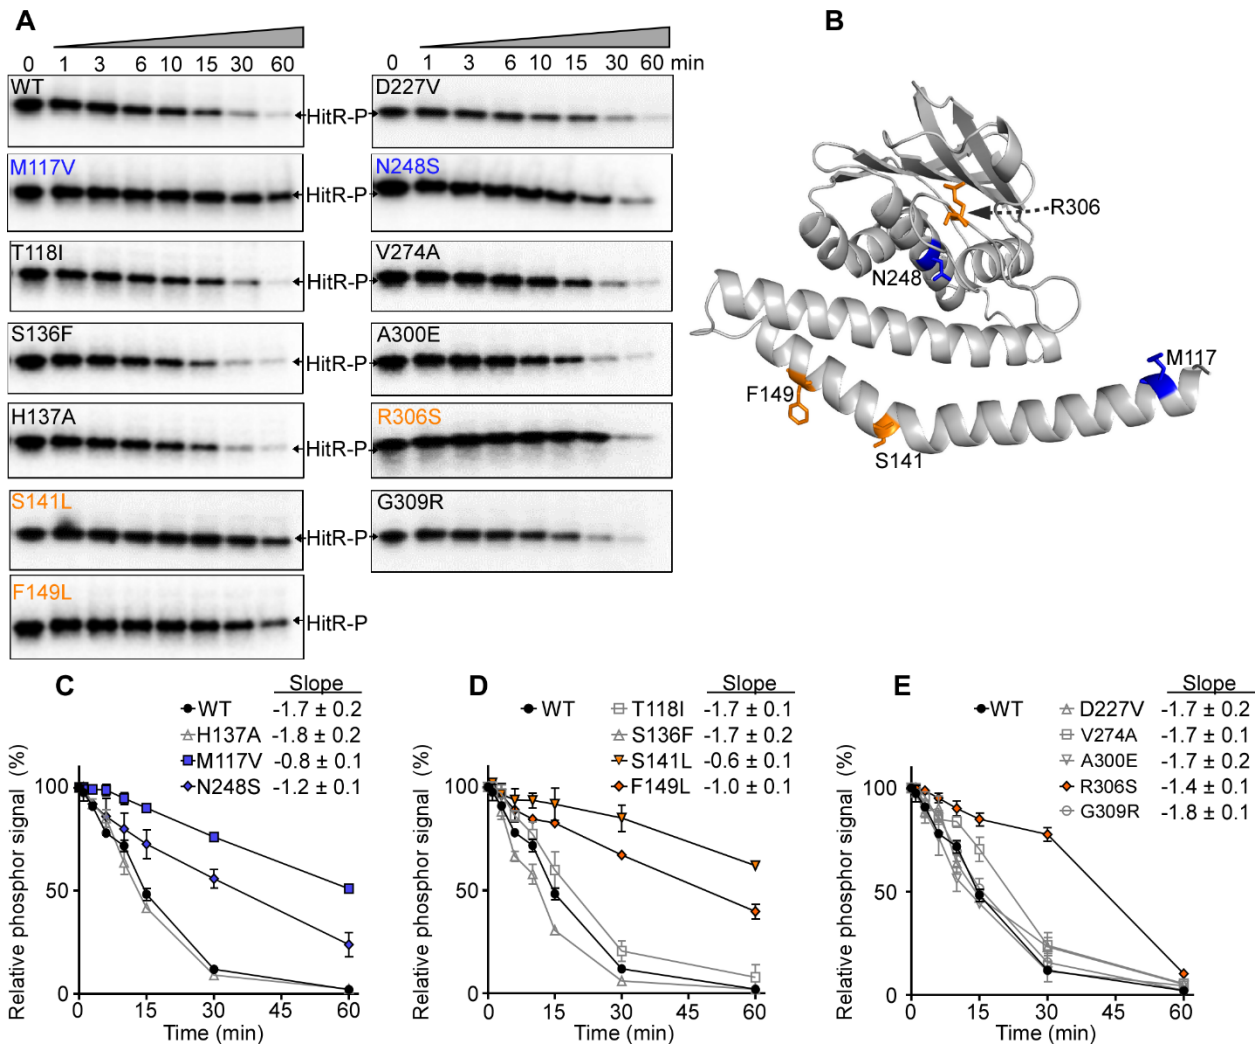

900

901

902

**Figure 6. Critical residues required for the phosphatase activity of HitS**

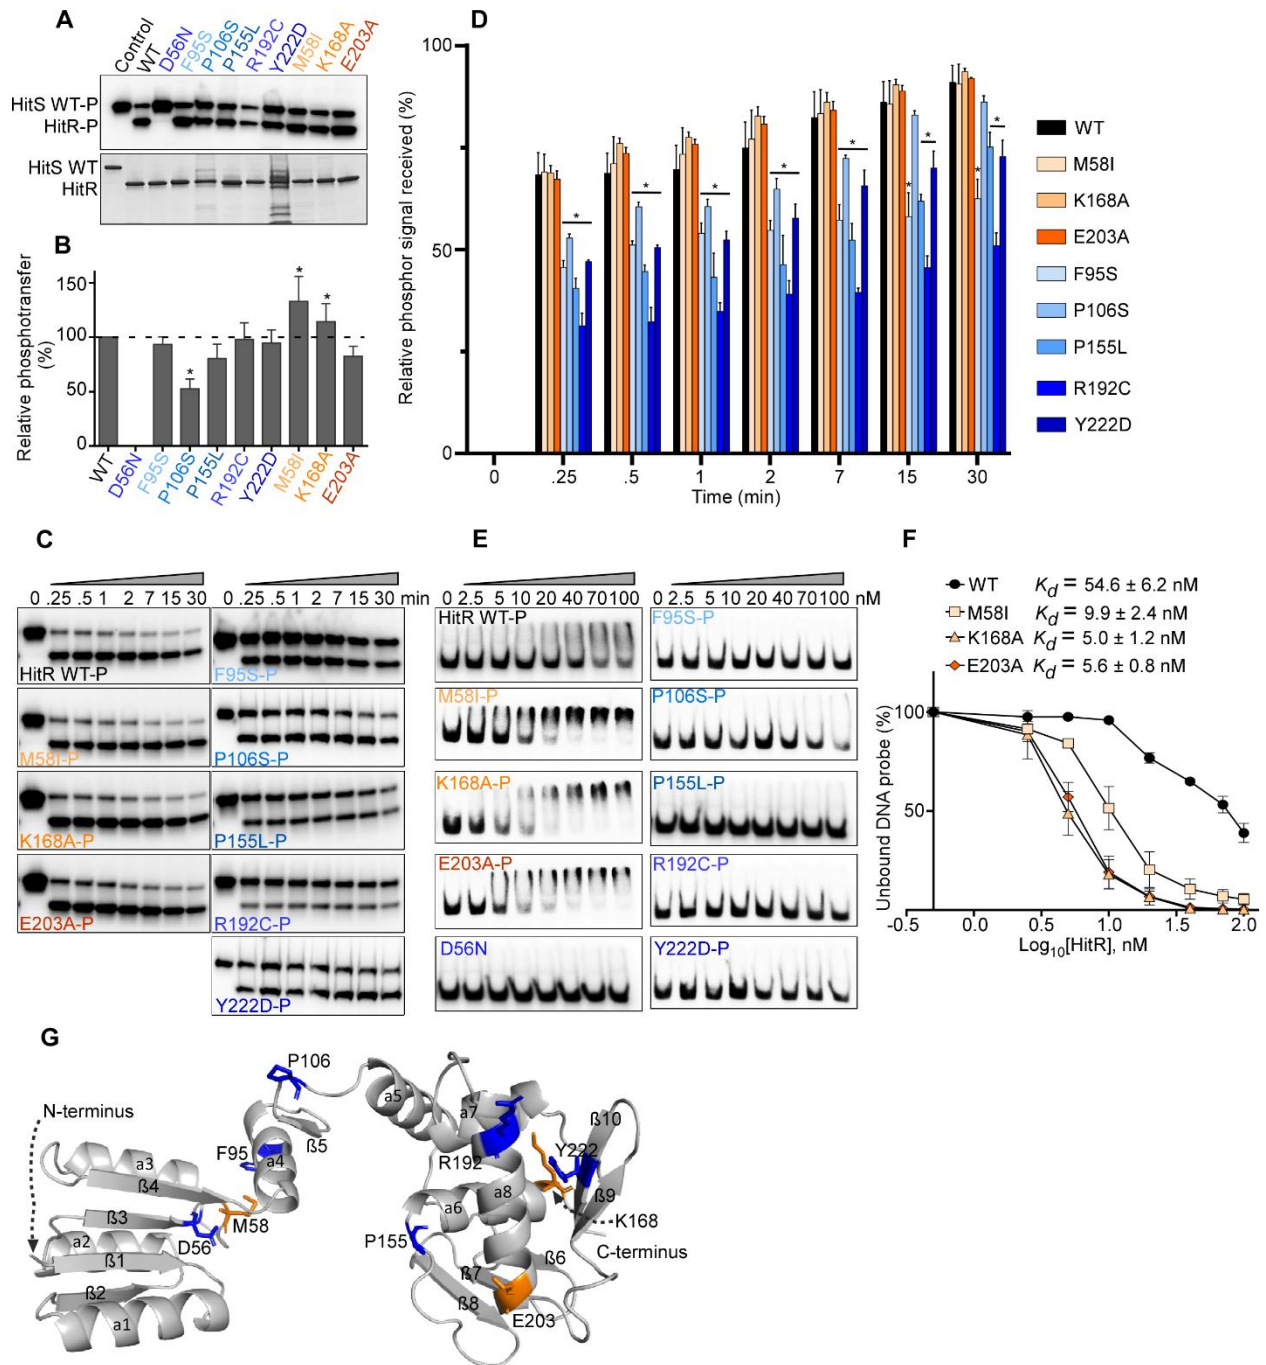

903

904 **Figure 7. Residues essential for HitR activation and specific interaction within HitR**
